# Supplementary material for: A Bayesian causal inference model to evaluate shoulder pathology effect on glenoid bone mineral density
Source: Research Square preprint supplement (doi:10.21203/rs.3.rs-3936346/v1), 2024-02-26
Supplement: Supplementary file 1 [file 3441e370c4293f91ee04e0c5.pdf]

## 10 Supplementary materials

### 10.1 Model validation with synthetic data

To ensure that the proposed model could recover the real parameter values based on the causal structure, we tested the model with synthetic data before feeding it the real data. We fixed the average, age, and BMI  
515  $(\alpha, \beta, \text{ and } \gamma)$  effects on glenoid BMD and we generated data stochastically as follows (For simplicity we did not consider the kernel effect here).

$$BMD_i \sim Normal(\mu_i, \sigma) \quad (15)$$

$$\mu_i = \alpha_{l[i],g[i]} + \beta_{l[i],g[i]}(age_i - \overline{age}) + \gamma_{l[i],g[i]}(BMI_i - \overline{BMI}) + \epsilon \quad (16)$$

Where  $\epsilon$  is the noise term, considered to be  $Normal(0, 1)$ . For a better match of the data generation process with the real data, we considered a similar number of subjects for each group as in the real dataset of the study. The code for this validation is also available in the repository (gitLab). With this process, we also  
520 assessed the necessary number of subjects for a reliable estimate of the parameters. We found out that 300 (synthetic) subjects would produce reliable estimates of the parameters (Fig A2, A3, A4). This number of synthetic subjects justified the number of real subjects used in this study. With 300 (synthetic) subjects, the difference of the estimates compared to the real effect was 0 [-0.08, 0.05] with the unit of [z-score of ST BMD] for average effect ( $\alpha$ ), 0 [-0.01 0.01] [z-score of ST BMD / One unit change of age] for age effect  
525 ( $\beta$ ), and -0.01 [-0.02, 0.00] [z-score of ST BMD / One unit change of BMI] for BMI effect ( $\gamma$ ). We point out that this synthetic data simulation, indeed could not capture everything that may happen in the real dataset, nonetheless, it helped in providing insight into the number of data necessary for the study to have reliable estimates. This analysis was also sensitive to the noise term  $\epsilon$ . We believe that a  $Normal(0, 1)$  noise added to the generated BMD can be a reliable method for evaluating the performance of the model.  
530 Increasing/decreasing the noise level obviously decreases/increases the estimate's reliability.

### 10.2 Likelihood evaluation

For the outcome distribution, we argue that a normal distribution was a suitable choice. We showed this point by plotting the pareto-smoothed importance sampling cross-validation (PSIS) [64] and widely applicable information criteria (WAIC) [65] of the model (Fig. A5). For the normal-based model's out-of-sample

predictions, there were no points with higher PSIS Pareto k than 0.7 which could make the importance weight unreliable and WAIC penalty high [64]. 535

### 10.3 Prior predictive simulation

Predictive prior simulation is assessing what we might see from our set of priors, before introducing real data to the model [66]. This technique could be useful in designing priors to minimize unrealistic predictions. In Stan, we could use the same model definition and just disable the likelihood part of the model. We used this technique to design the priors of the model and evaluated the predicted BMD differences (Fig. A6, A7, A8, A9). The tuned set of the priors resulted in a mainly higher ST BMD for OA than CTRL subjects, with a higher density between 100 to 300 HU (Fig. A6, A8), and a mainly CTA-CTRL difference in the range of -100 to 200 HU (Fig. A7, A9). Moreover, the ST BMD changes with age and BMI also seemed reasonable. There were a few extreme and unrealistic slopes, which was indeed expected as samples could be drawn from tails of the parameters distribution leading to strange predictions. 540 545

### 10.4 More simulations from posterior distribution

Here we provided more simulations with the Bayesian model. We kept age constant at 50, 60, 70, 80, and 90 years old, and at each age, we simulated OA-CTRL and CTA-CTRL ST BMD differences for female and male, at BMI of 17, 25, and 33 (Fig. A13). 550

### 10.5 CT Kernel

We assessed the kernel effect on calculated ST BMD differences for OA-CTRL female (Fig. A14). As before we kept all of the variables constant and only changed the kernel. Differences were negligible and the highest difference happened in anterior-superior octant (24.8 [13.1 36.8] HU at 65 years).

### 10.6 HMC Convergence

The trace of the HMC sampling illustrated a robust sampling procedure for all model parameters (Fig A1). The sampling has been performed for 4 chains and 2000 iterations per chain. The initial 50% of the iterations were considered for warm-up and the last 50% for sampling. The trace exhibited characteristics indicative of 555



a sound HMC sampling process: stationary, where the chains remained within the high-probability region of  
560 the posterior distribution; mixing, where the chains effectively explored the distribution; and convergence,  
where multiple chains converged to the same high-probability region.

## 10.7 Figures

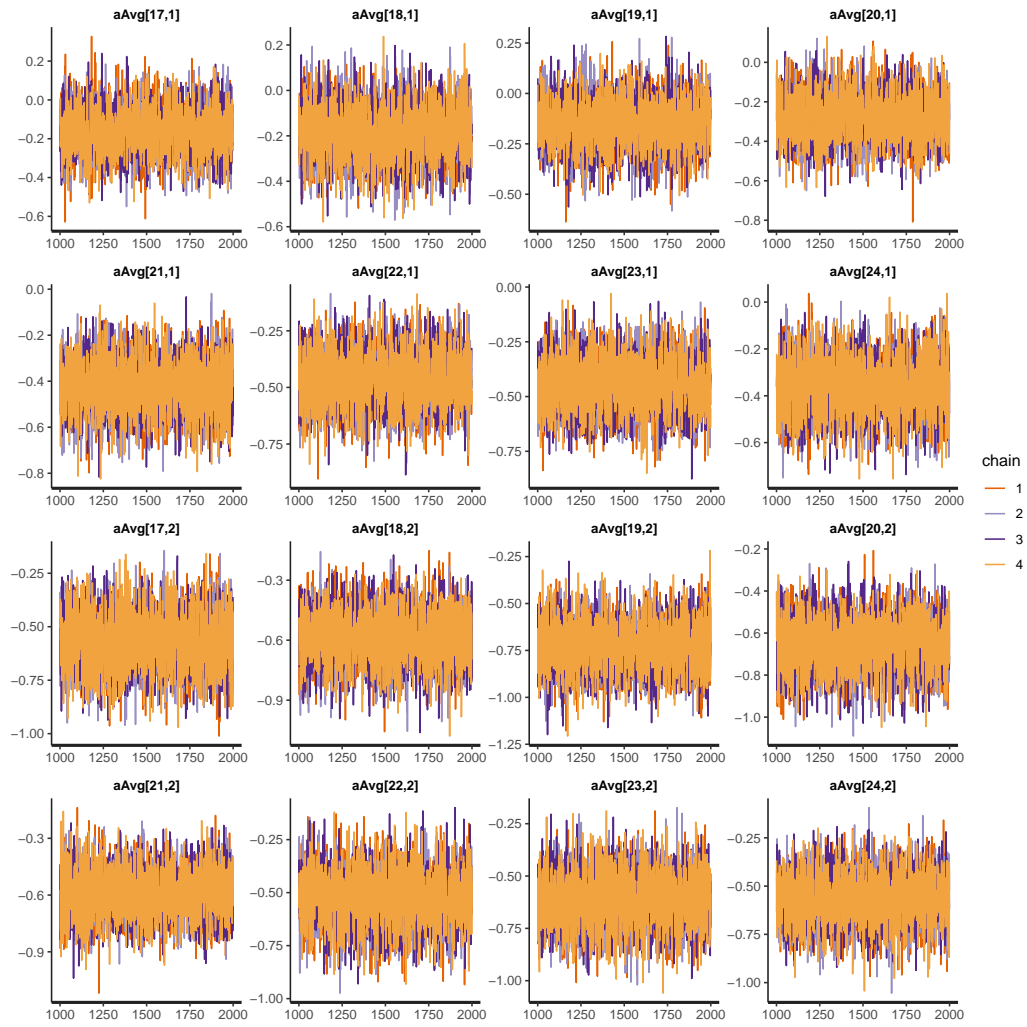

(a)

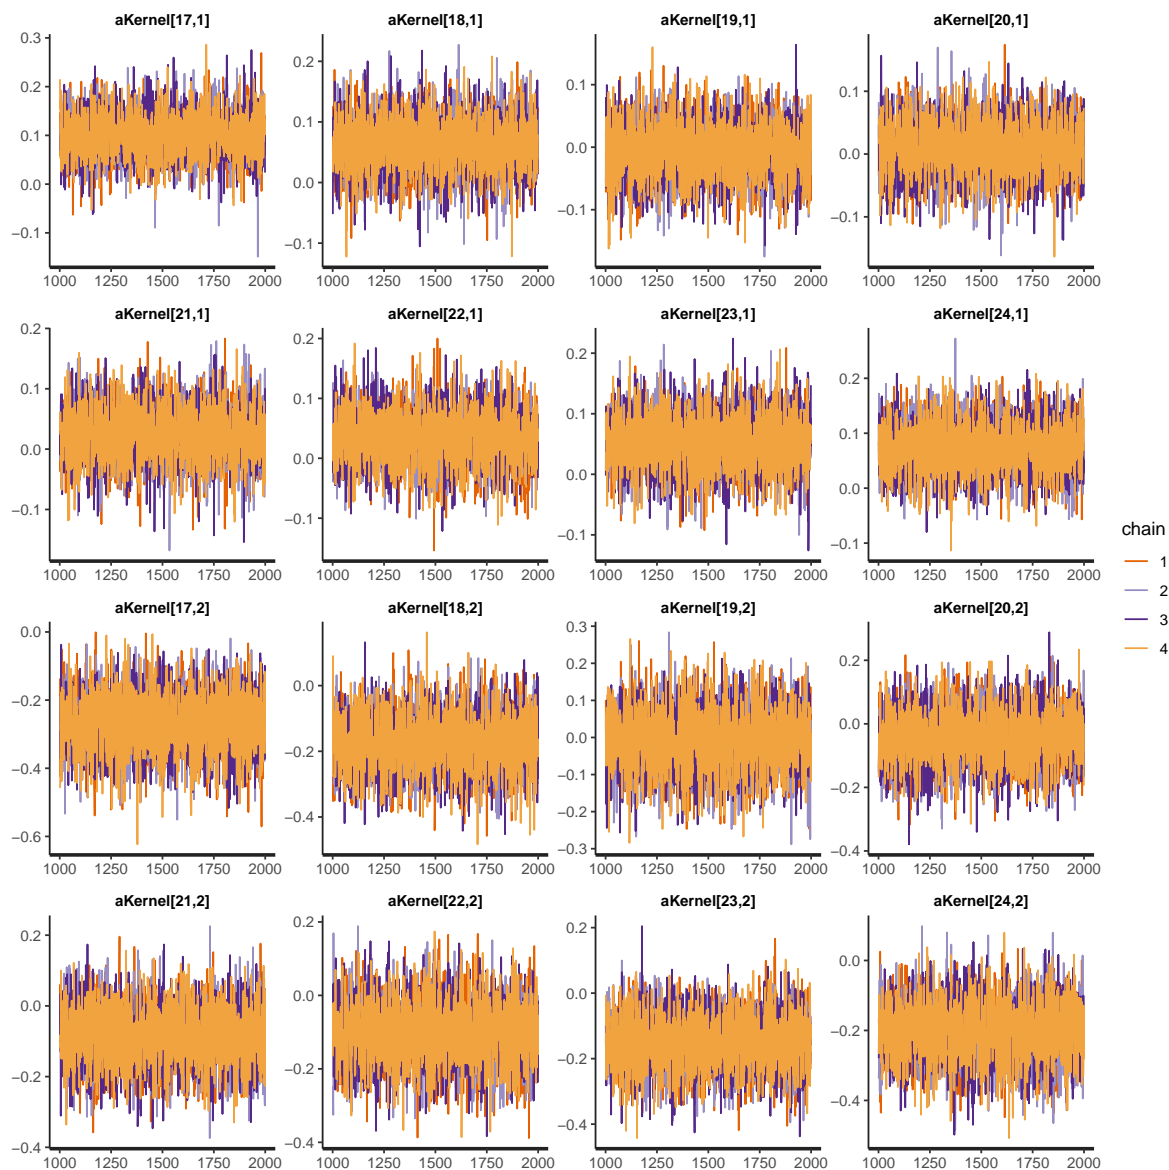

(b)

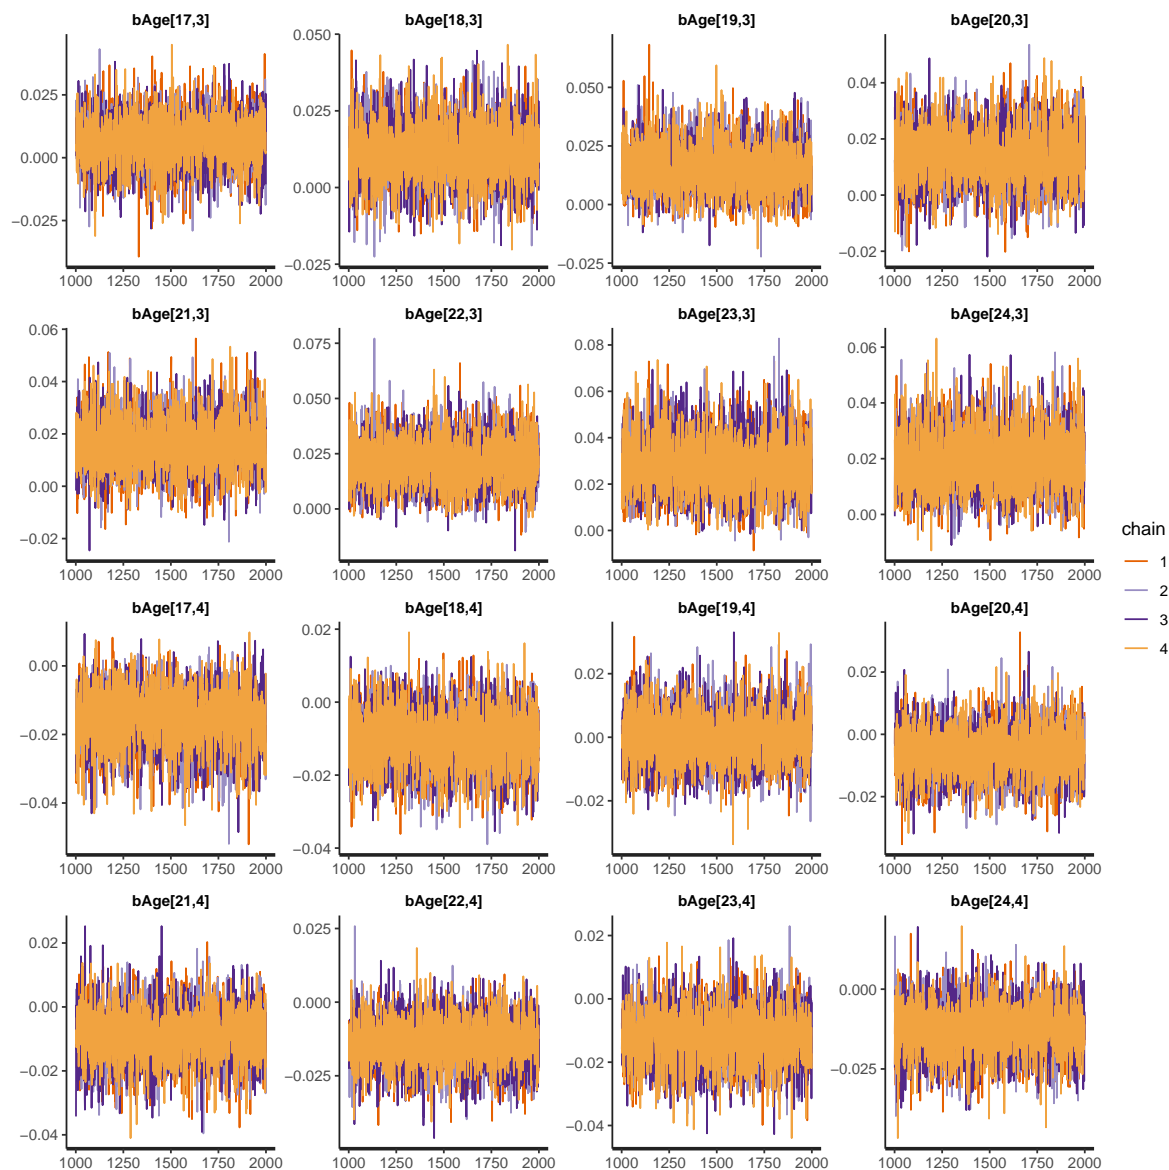

(c)

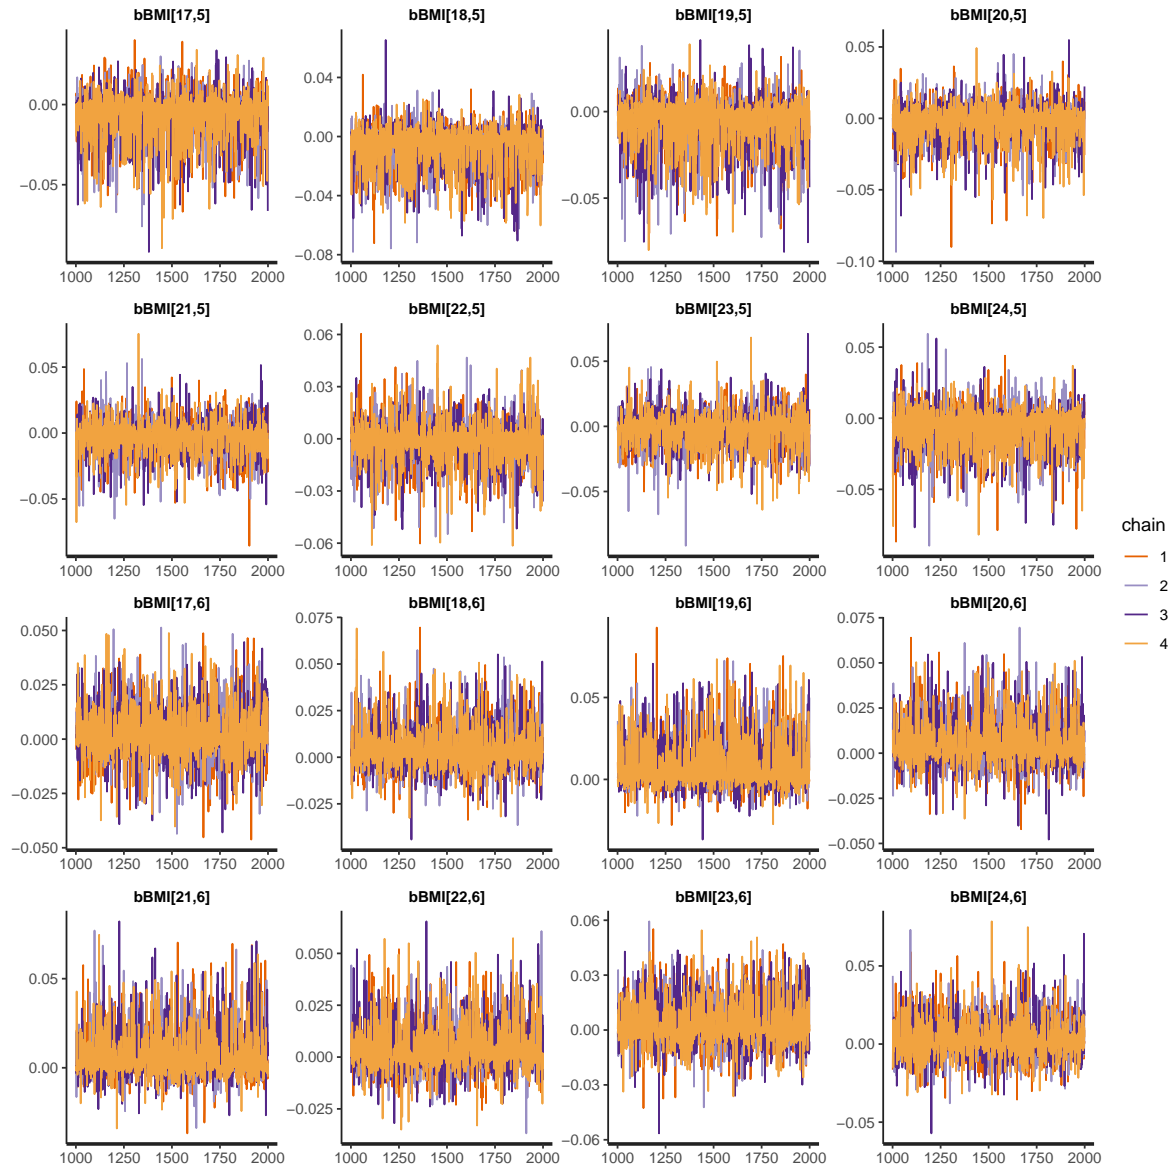

(d)

Figure A1: Trace of the sampling procedures of the four chains for some of the subsets of (a)  $\alpha$ , (b)  $\beta$ , (c)  $\gamma$ , (d)  $\zeta$  parameters. The x-axis corresponded to iterations of the chains, and the y-axis to the magnitude of the parameters represented as the titles of the graphs.

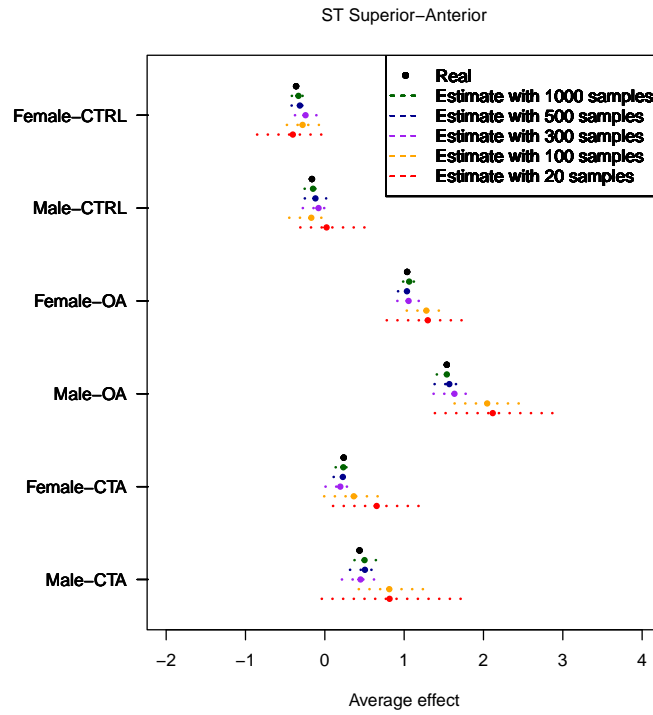

(a)

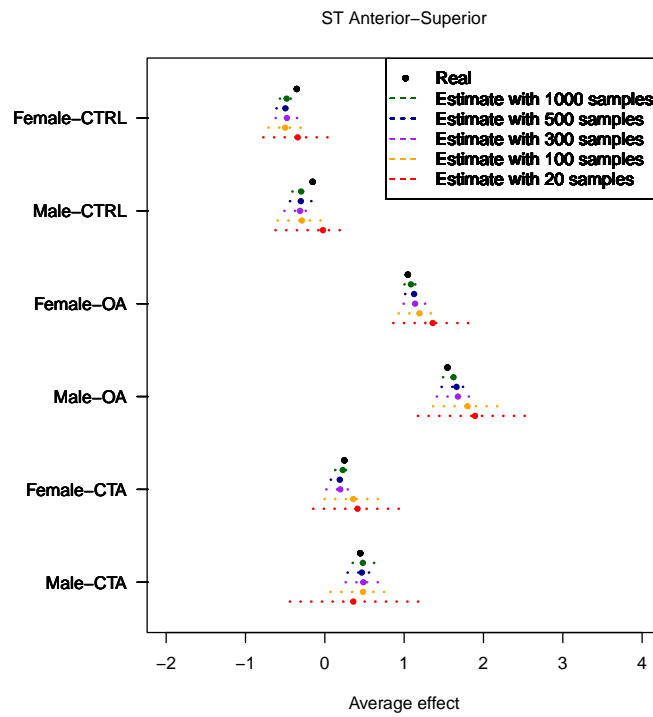

(b)

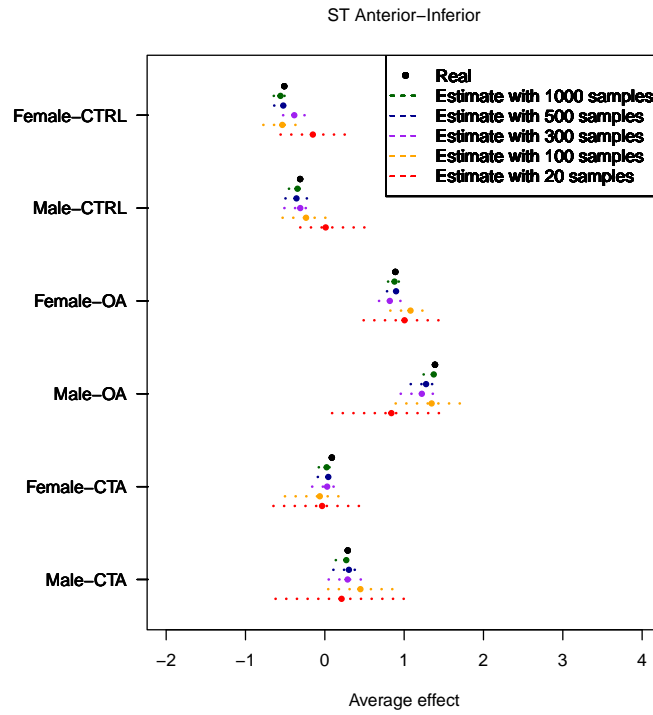

(c)

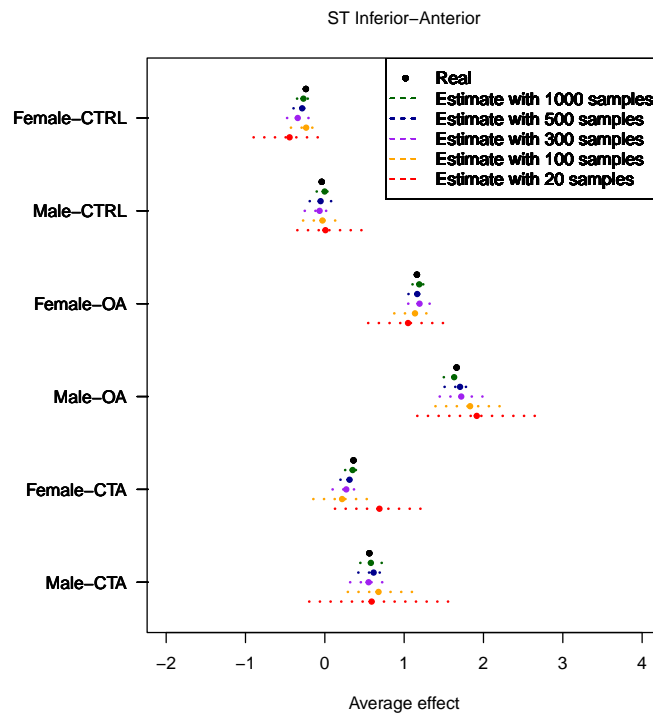

(d)

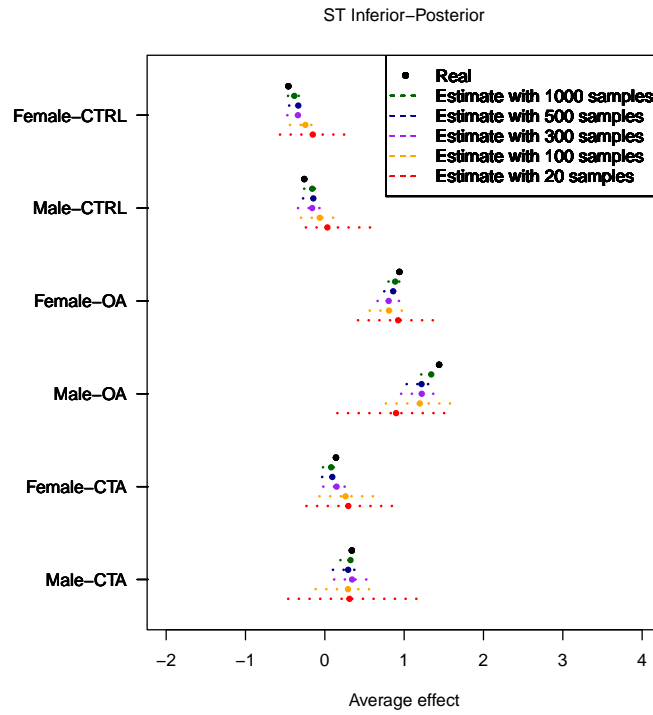

(e)

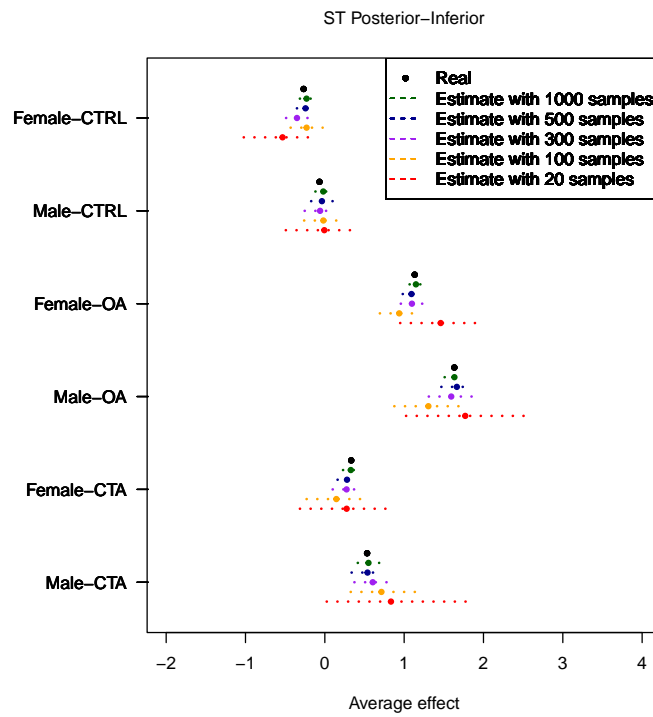

(f)



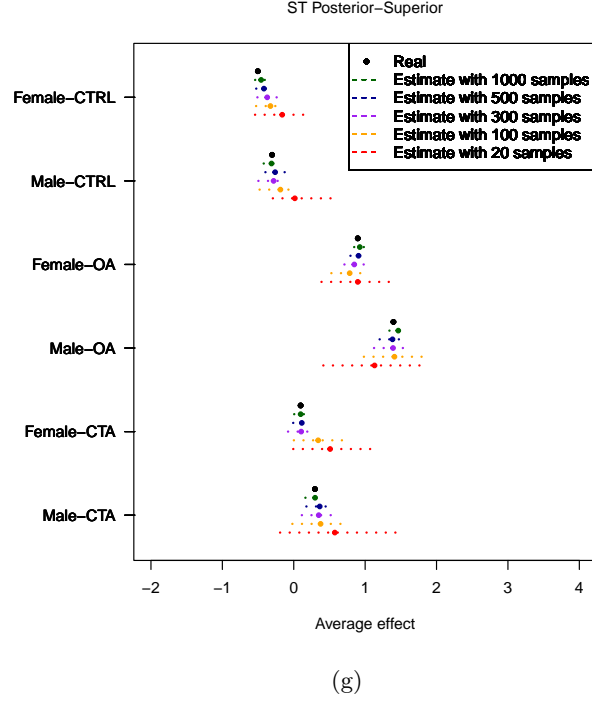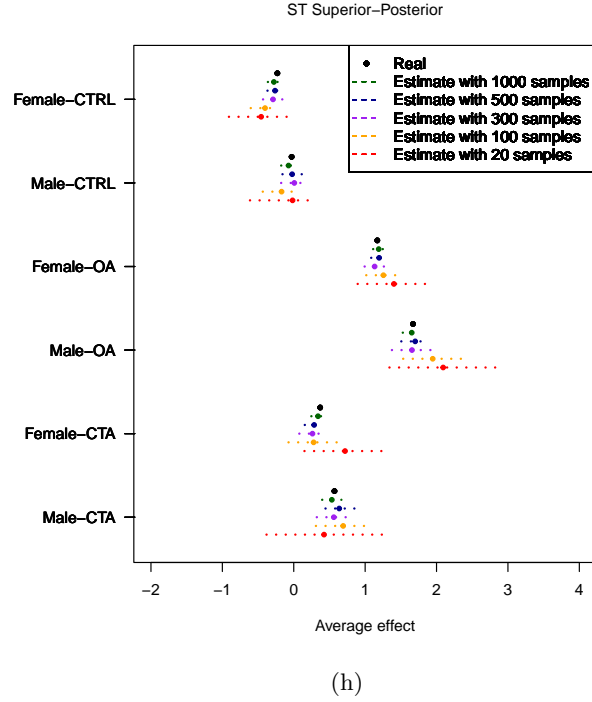

Figure A2: Real and estimated values of the average effect of location and group ( $\alpha_{l,g}$  in Eq. 16) based on 1000, 500, 300, 100, and 20 synthetic subjects, for each octant, from superior-anterior (a) to superior-posterior (h) of the ST VOI.

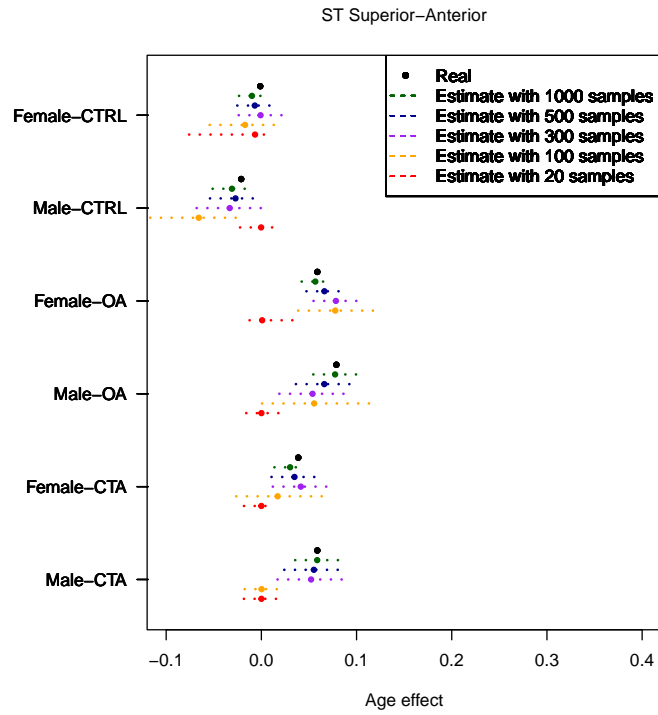

(a)

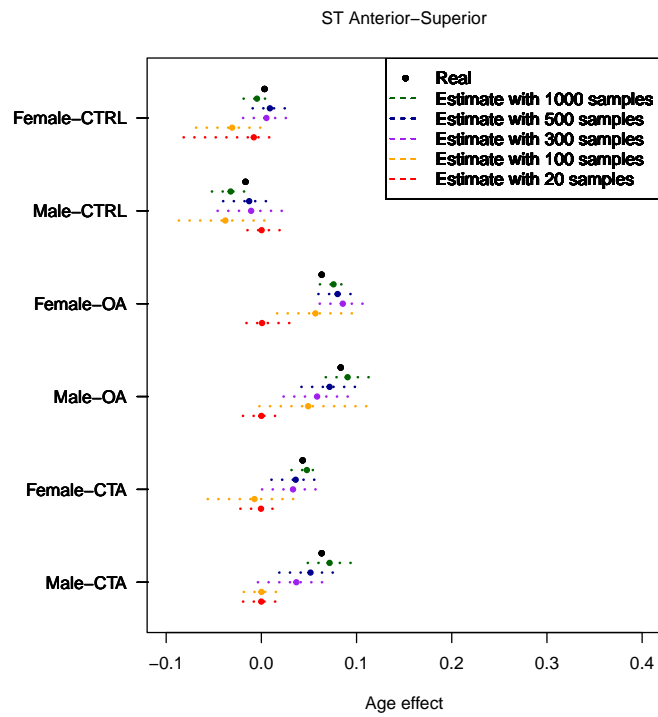

(b)

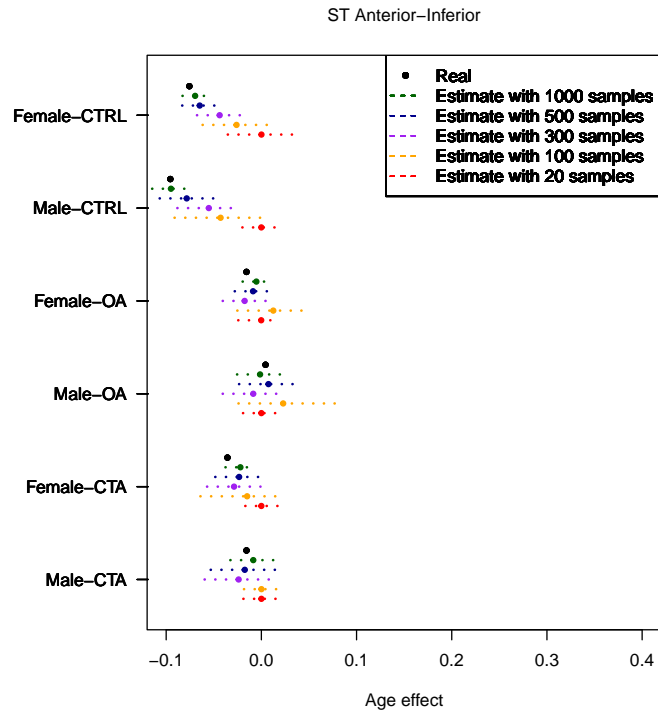

(c)

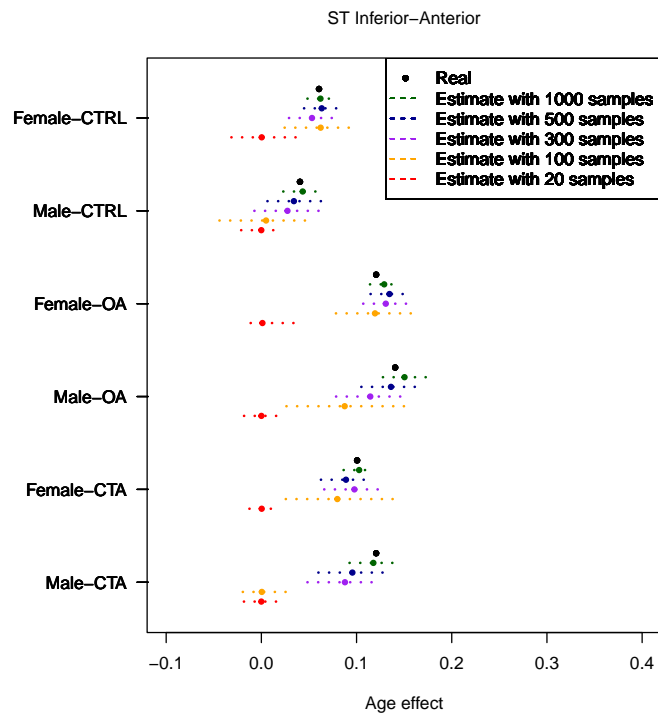

(d)

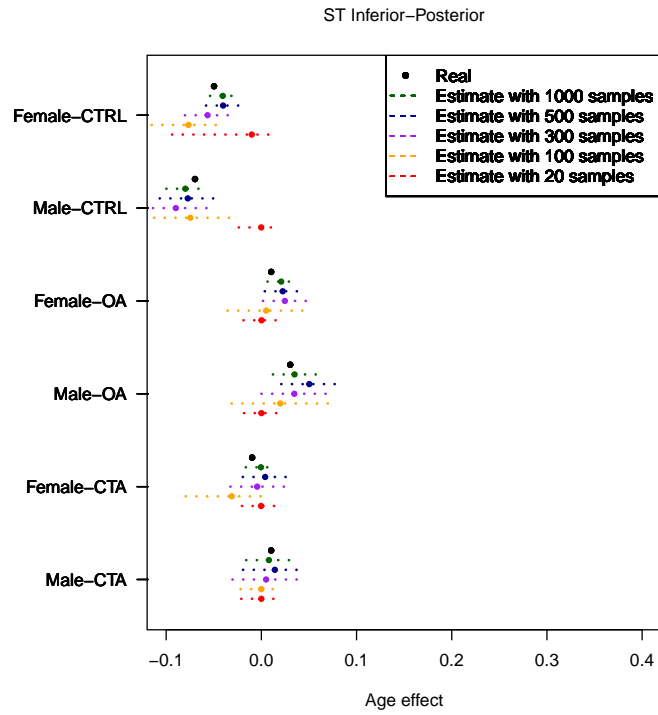

(e)

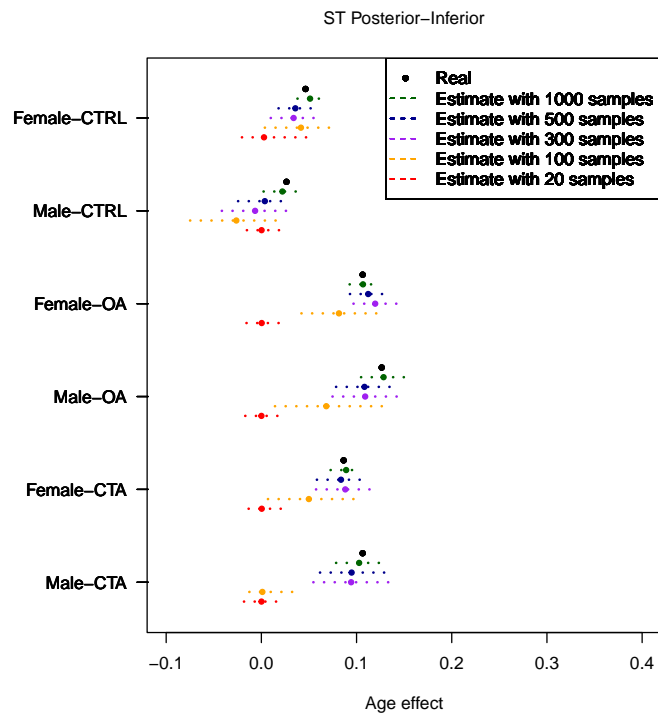

(f)

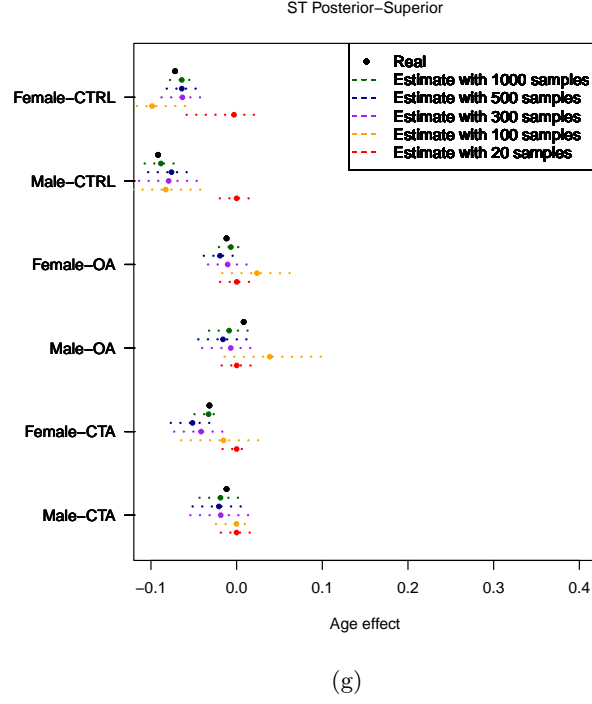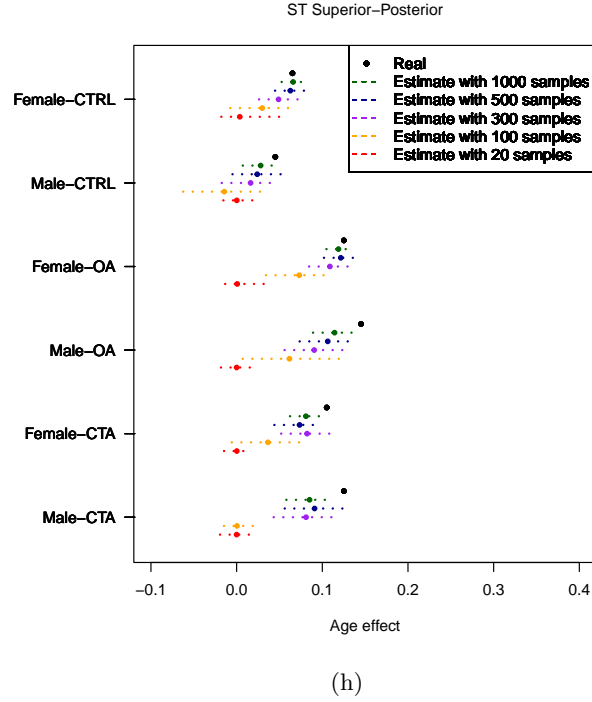

Figure A3: Real and estimated values of the age effect of location and group ( $\beta_{l,g}$  in Eq. 16) based on 1000, 500, 300, 100, and 20 synthetic subjects, for each octant, from superior-anterior (a) to superior-posterior (h) of the ST VOI.

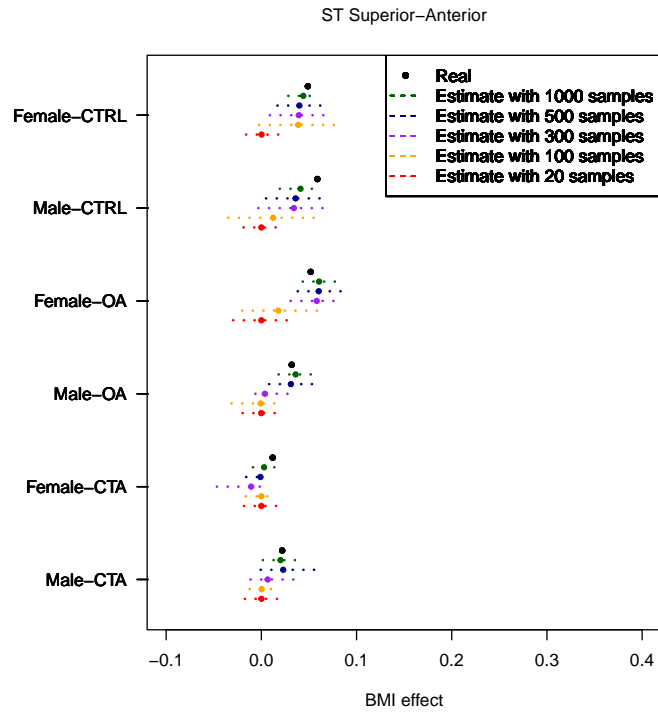

(a)

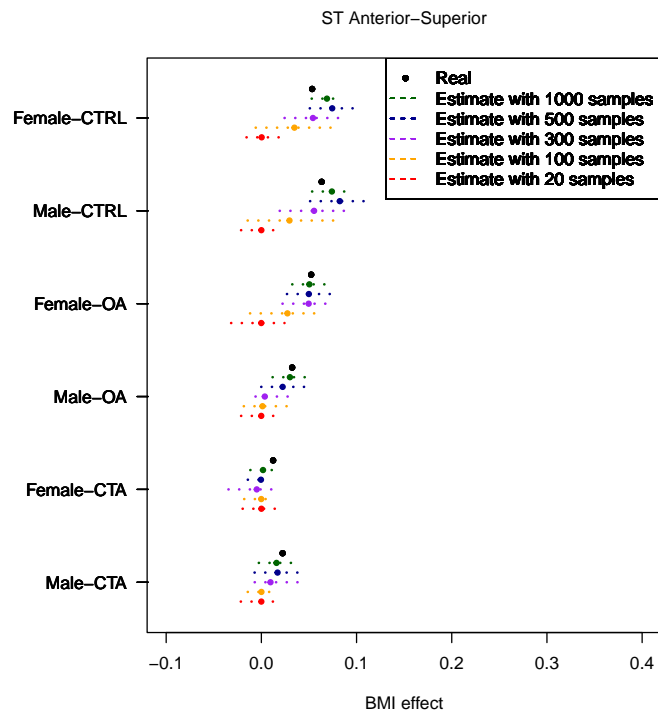

(b)

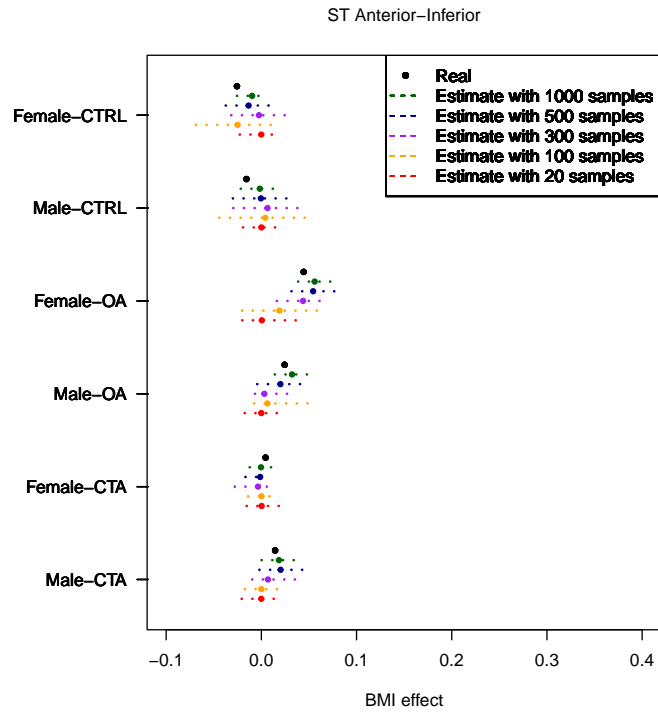

(c)

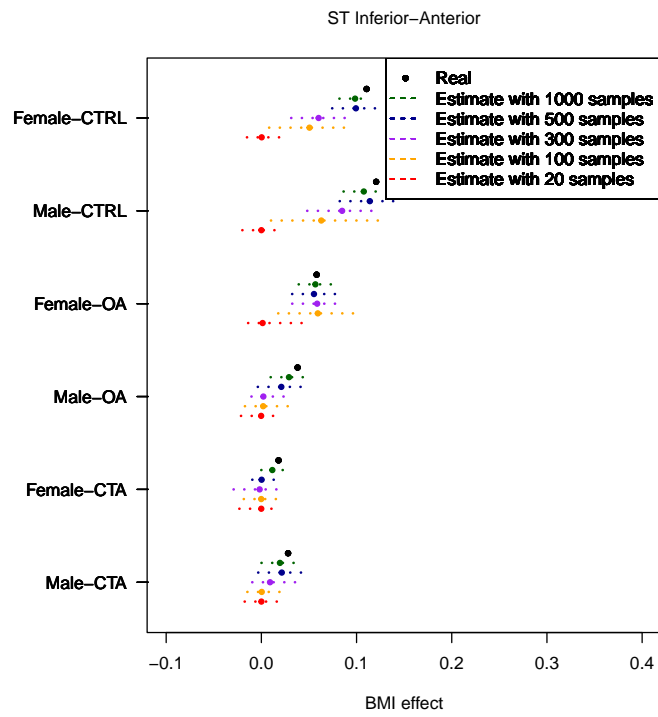

(d)

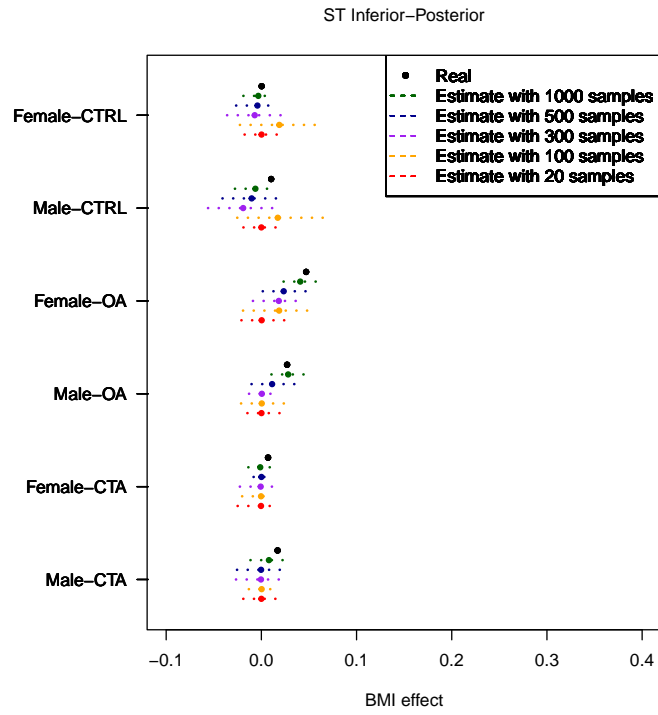

(e)

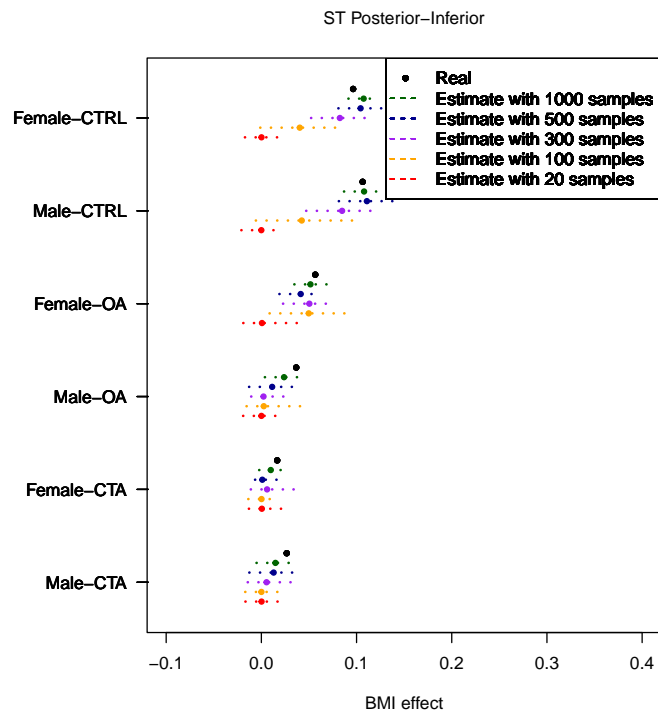

(f)



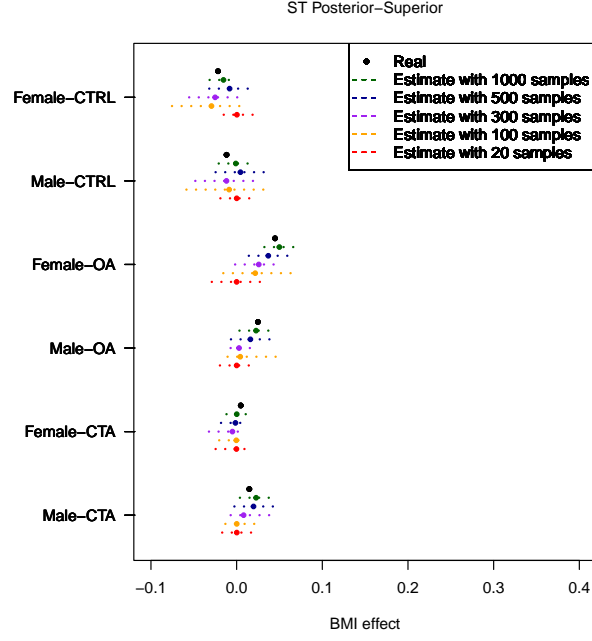

(g)

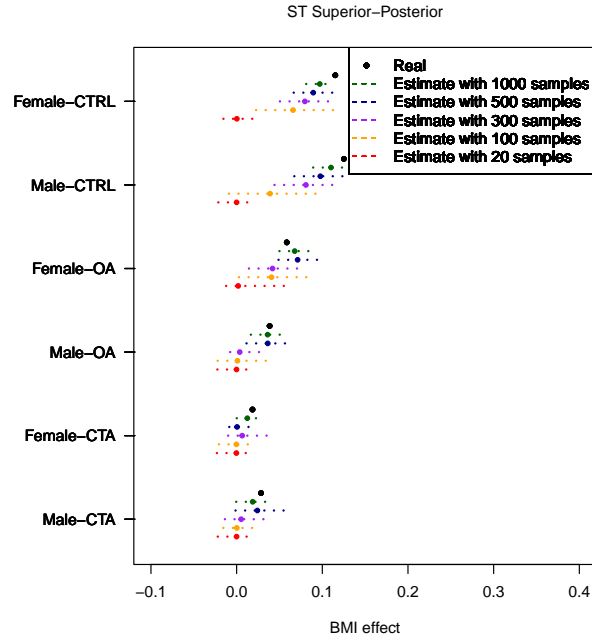

(h)

Figure A4: Real and estimated values of the BMI effect of location and group ( $\gamma_{l,g}$  in Eq. 16) based on 1000, 500, 300, 100, and 20 synthetic subjects, for each octant, from superior-anterior (a) to superior-posterior (h) of the ST VOI.

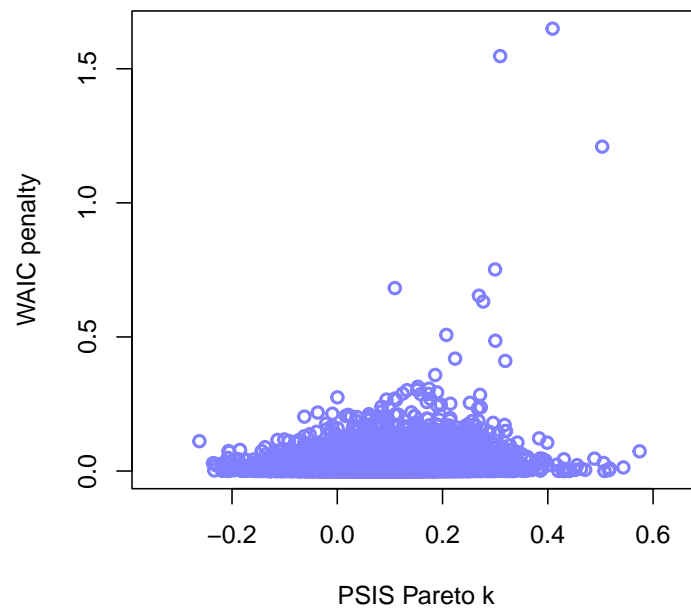

Figure A5: The pareto k from pareto-smoothed importance sampling cross-validation (PSIS) and widely applicable information criteria (WAIC) for the model with normal distribution as the outcome.

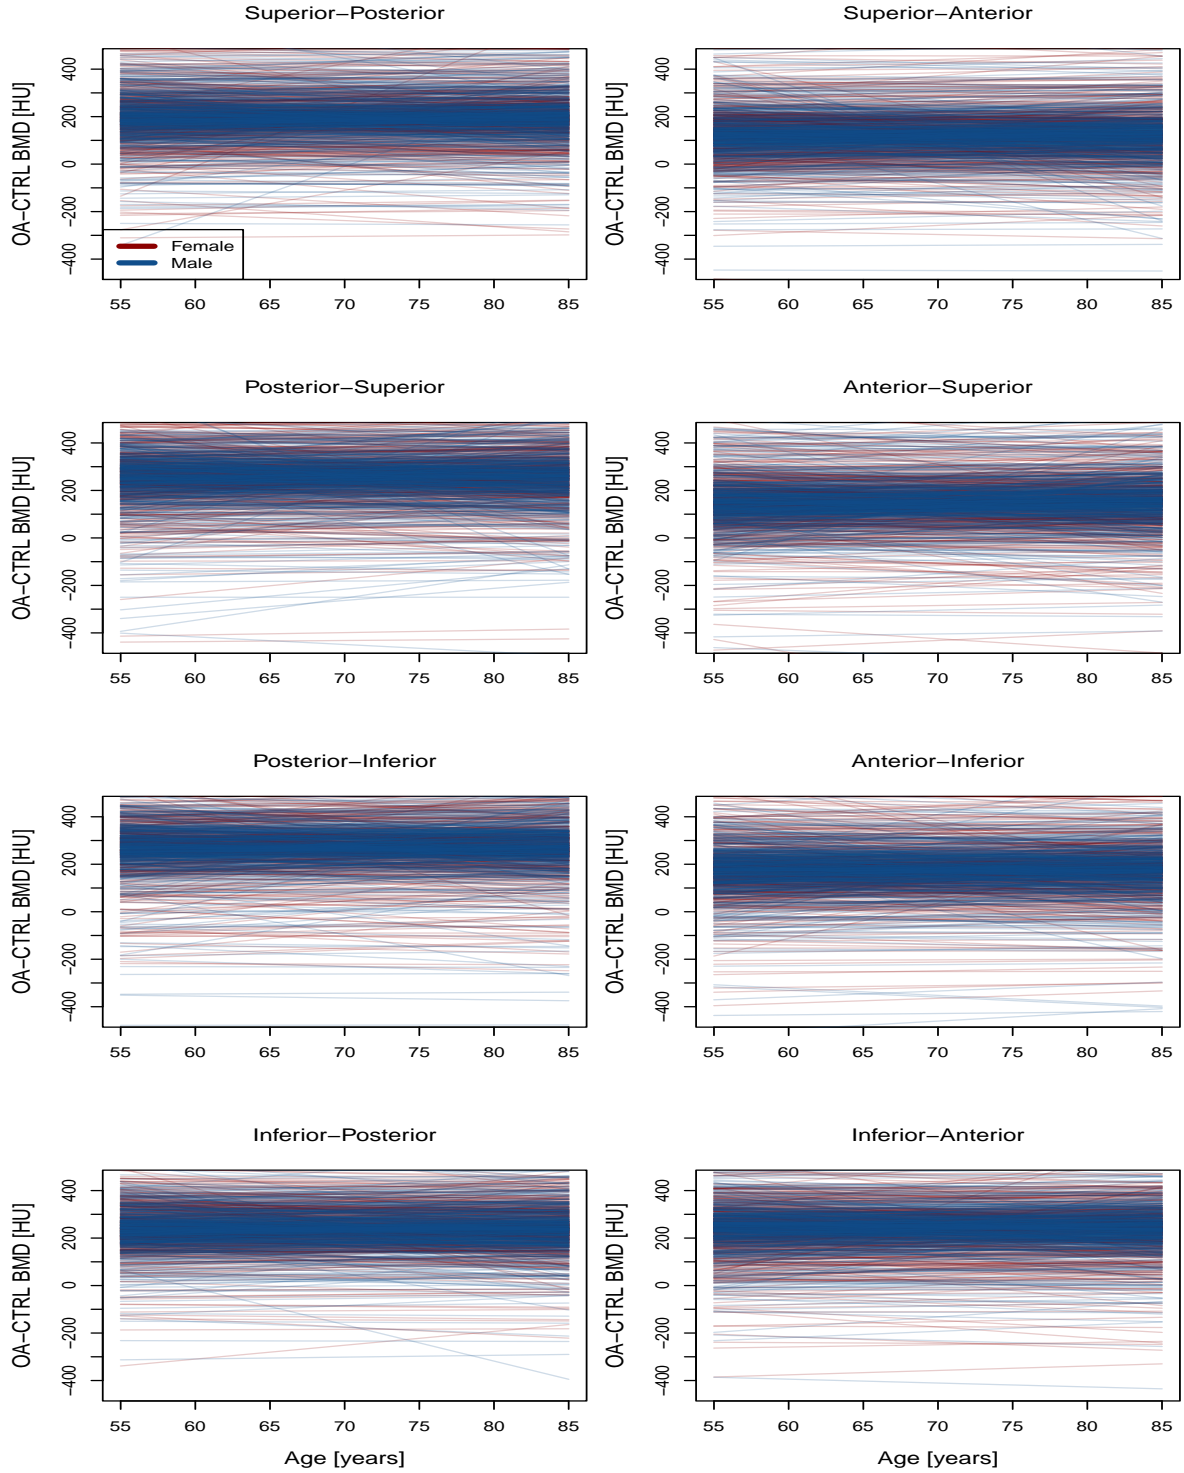

Figure A6: Prior predictive distribution of difference of BMD in ST between OA and CTRL (vertical axis) vs age (horizontal axis), for male and female, and for the 8 locations, while keeping BMI at 25 kg/m<sup>2</sup>.

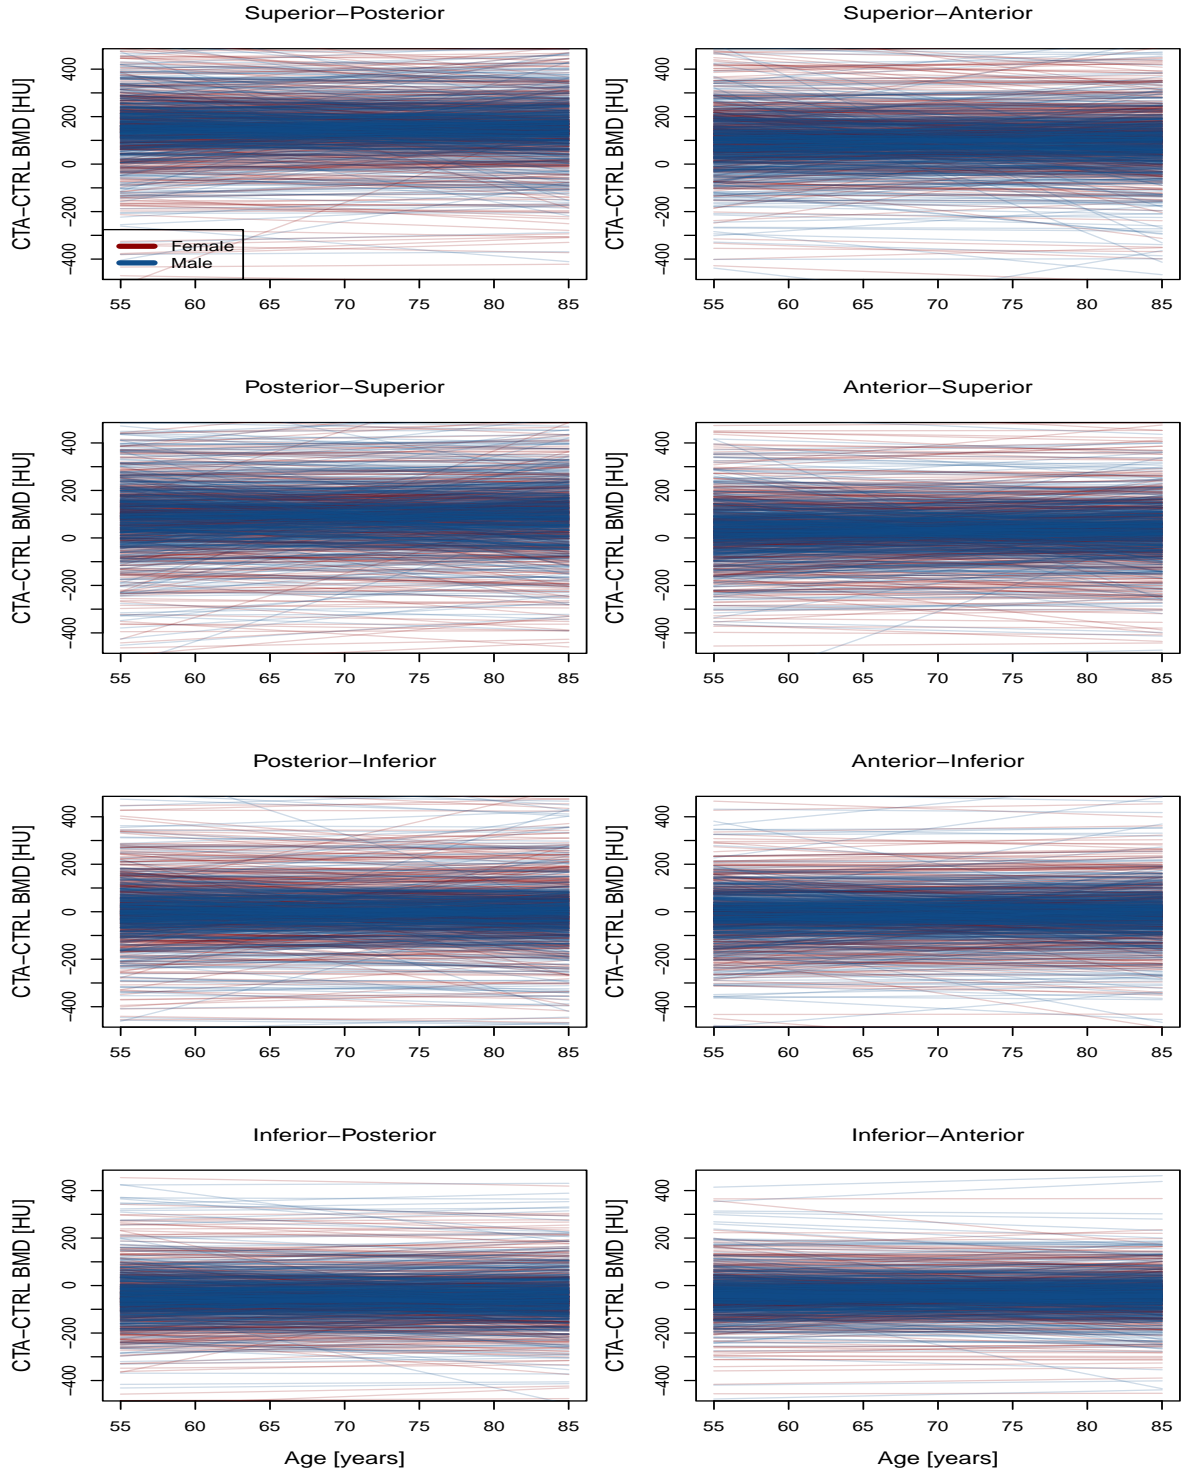

Figure A7: Prior predictive distribution of difference of BMD in ST between CTA and CTRL (vertical axis) vs age (horizontal axis), for male and female, and for the 8 locations, while keeping BMI at  $25 \text{ kg/m}^2$ .

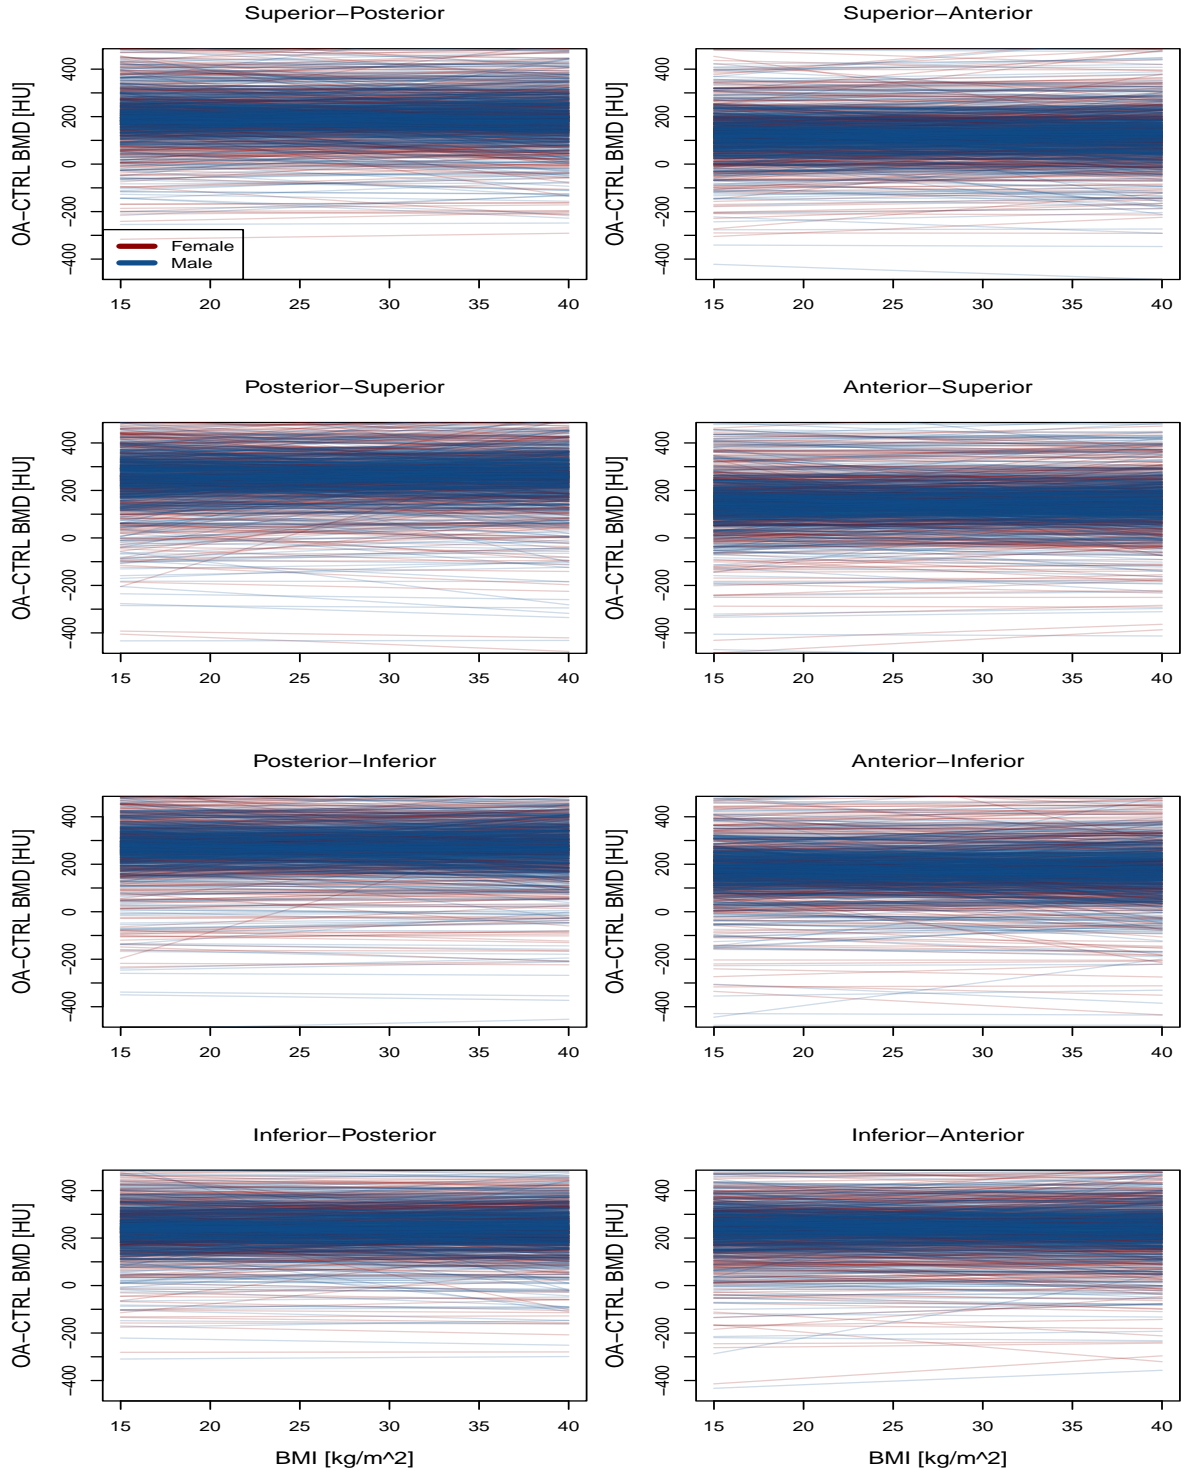

Figure A8: Prior predictive distribution of difference of BMD in ST between OA and CTRL (vertical axis) vs BMI (horizontal axis), for male and female, and for the 8 locations, while keeping age at 65 years.

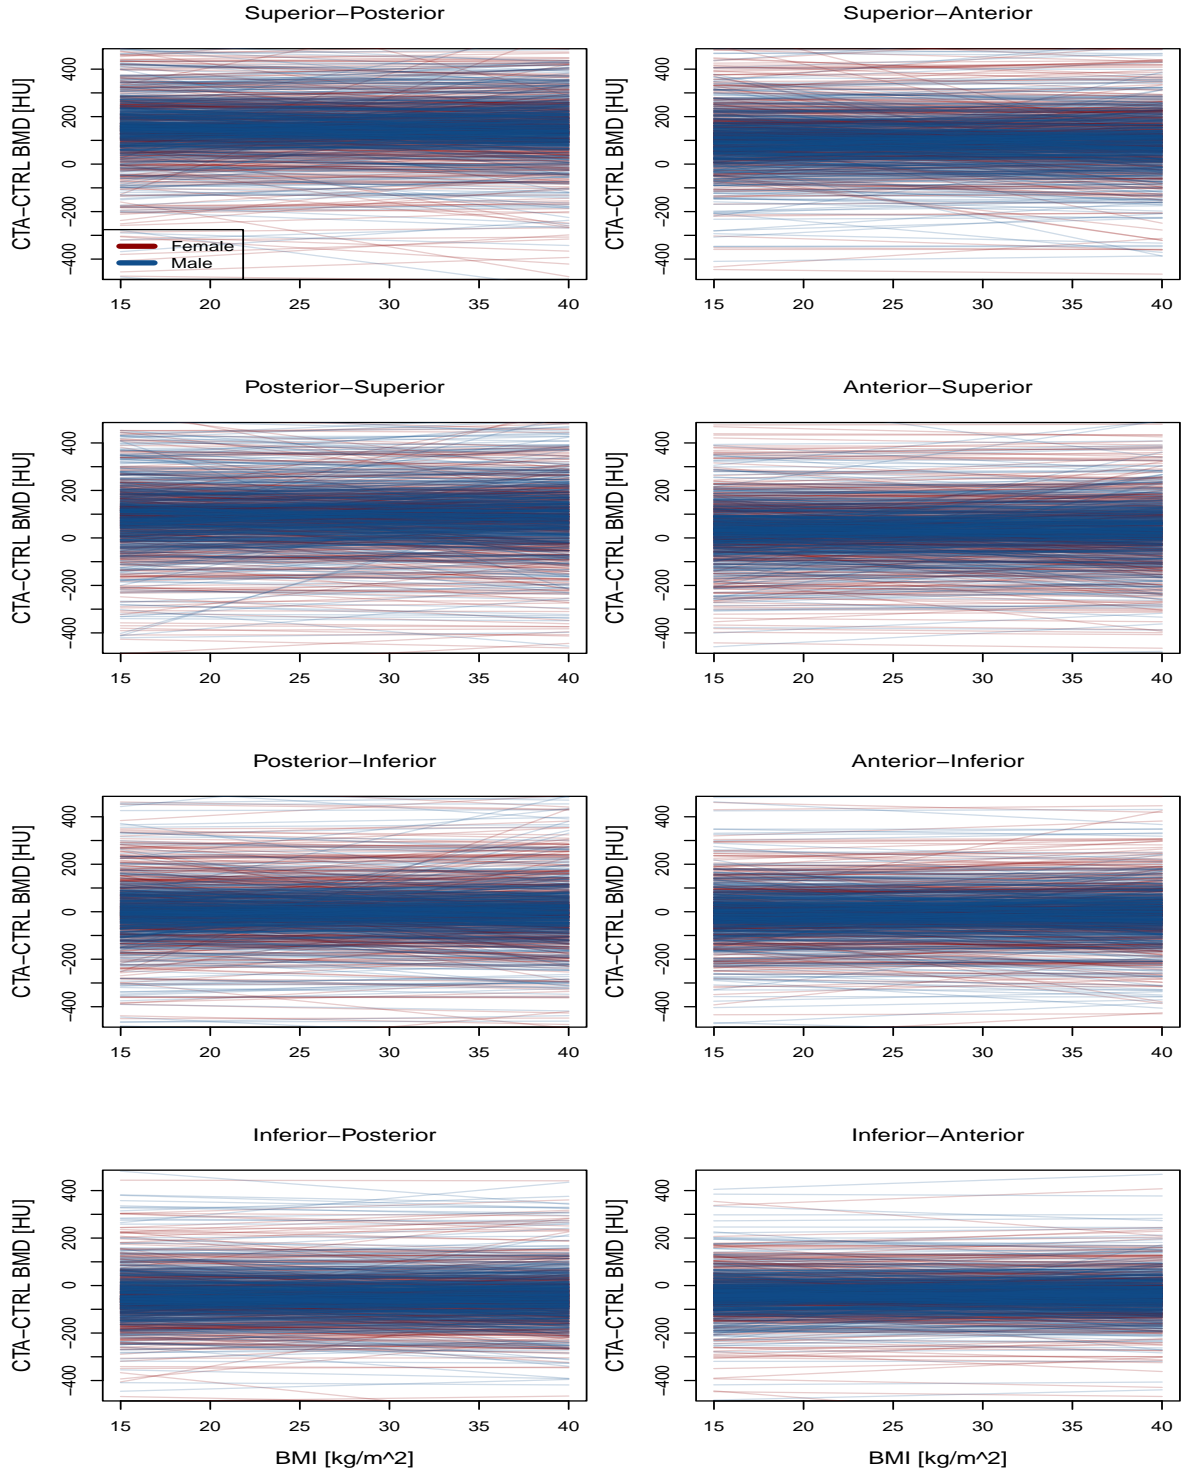

Figure A9: Prior predictive distribution of difference of BMD in ST between CTA and CTRL (vertical axis) vs BMI (horizontal axis), for male and female, and for the 8 locations, while keeping age at 65 years.

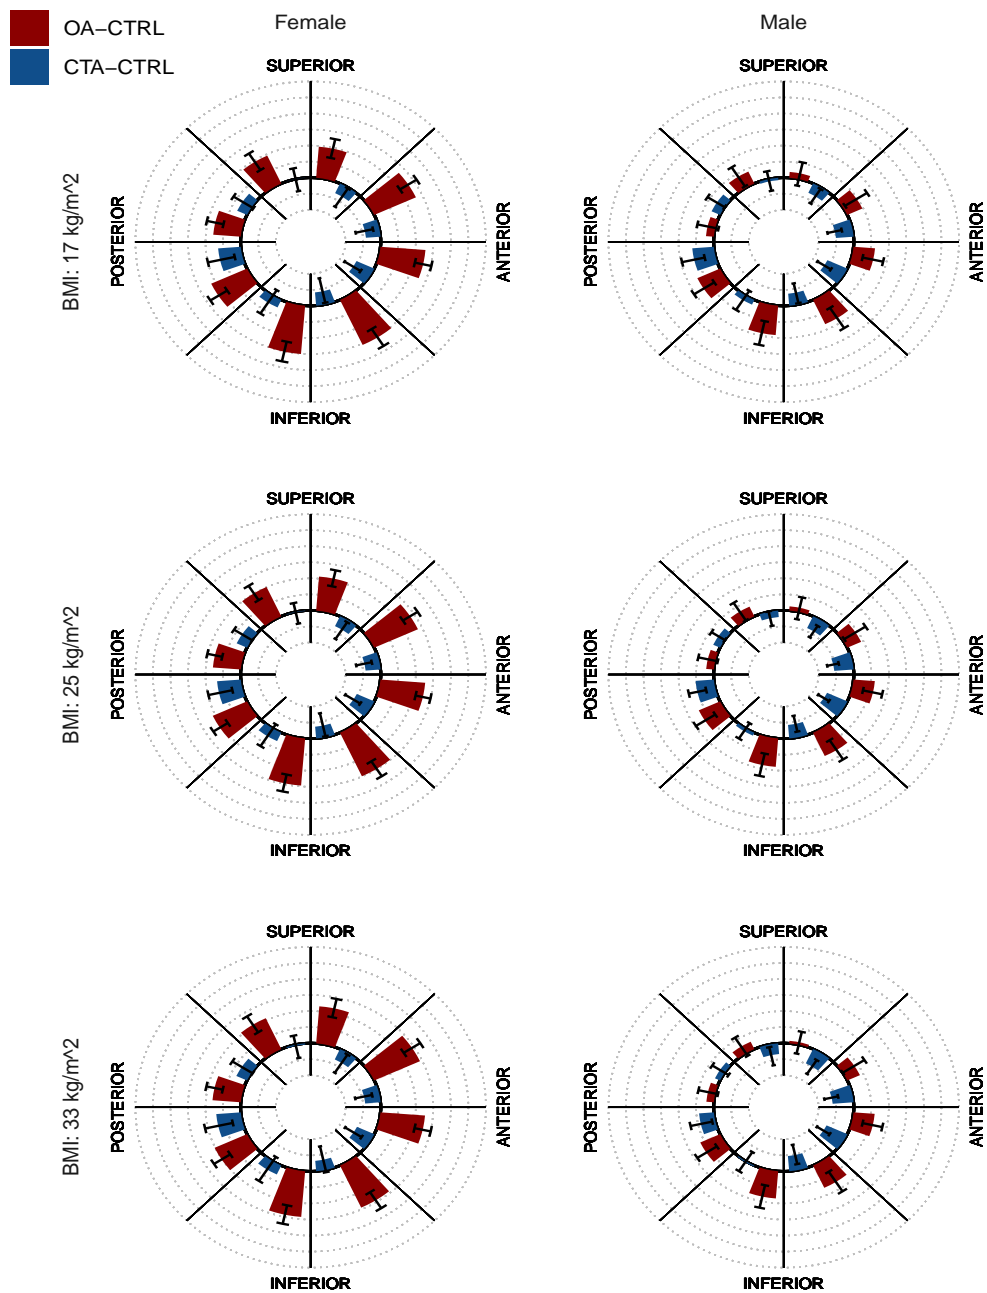

(a)



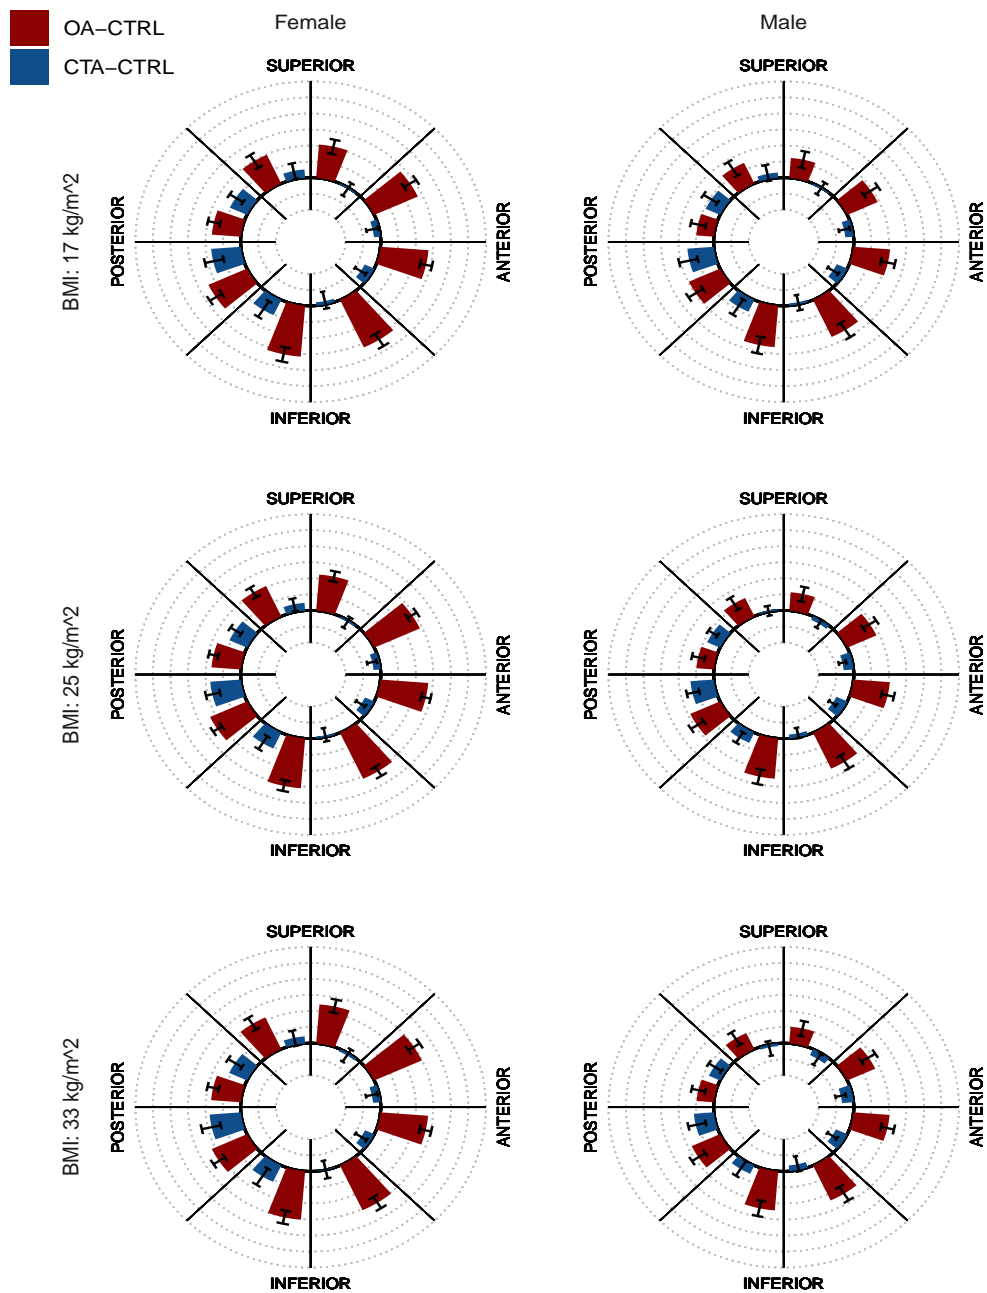

(a)



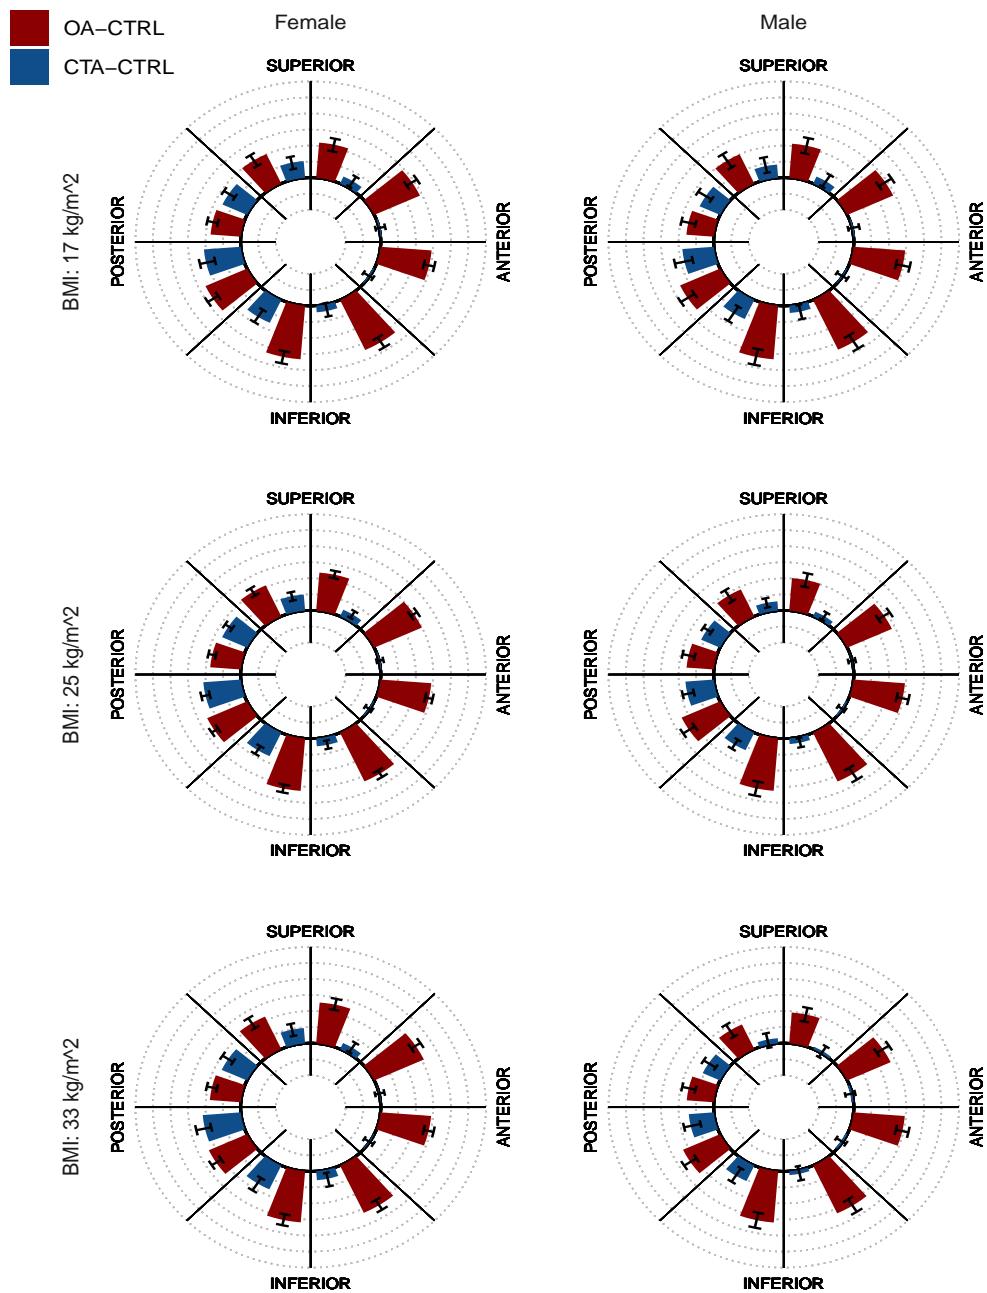

(a)

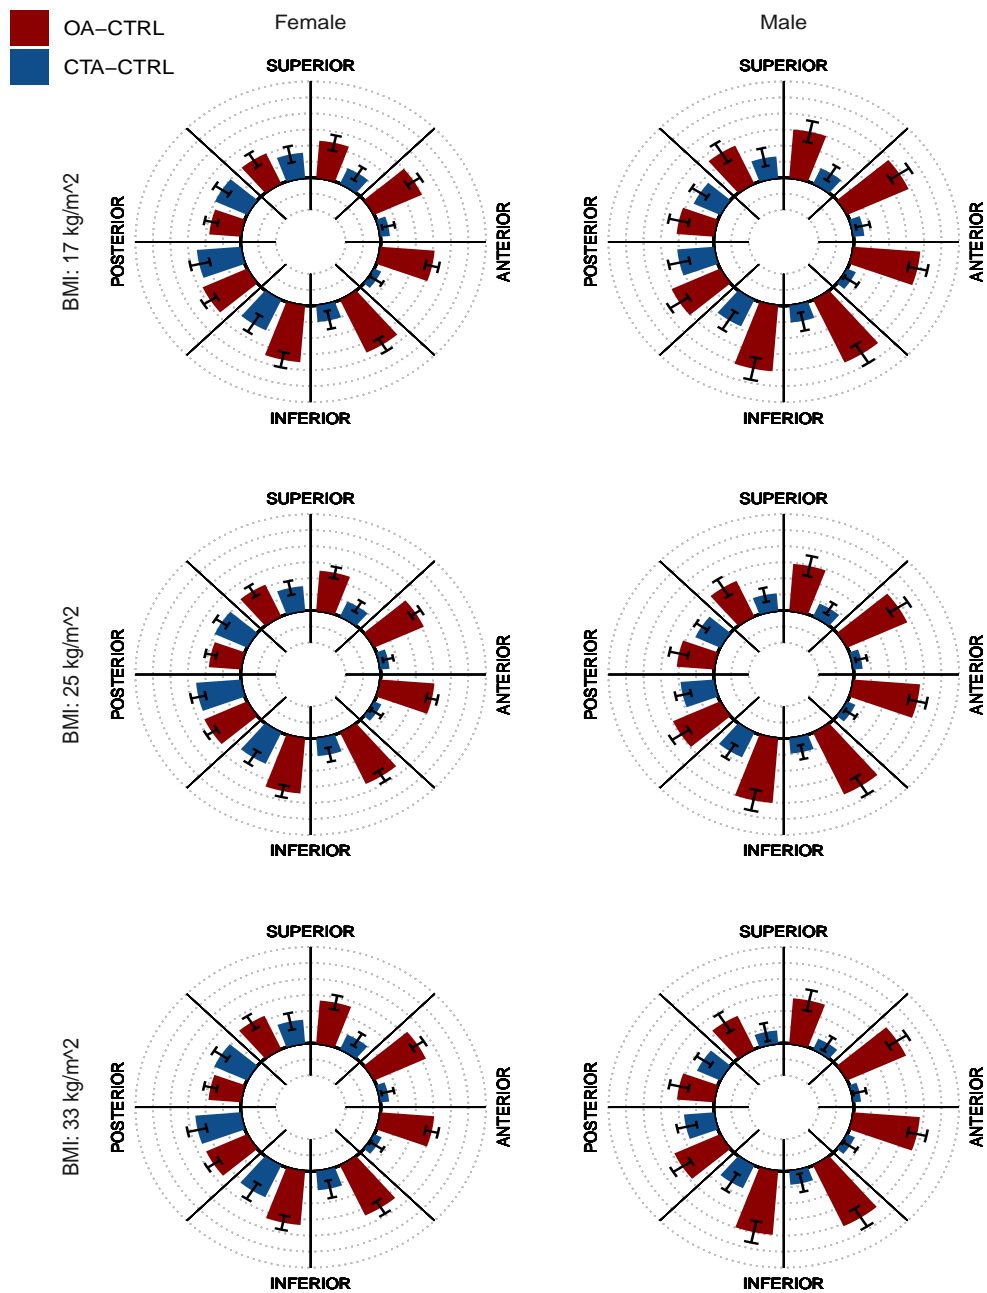

(a)

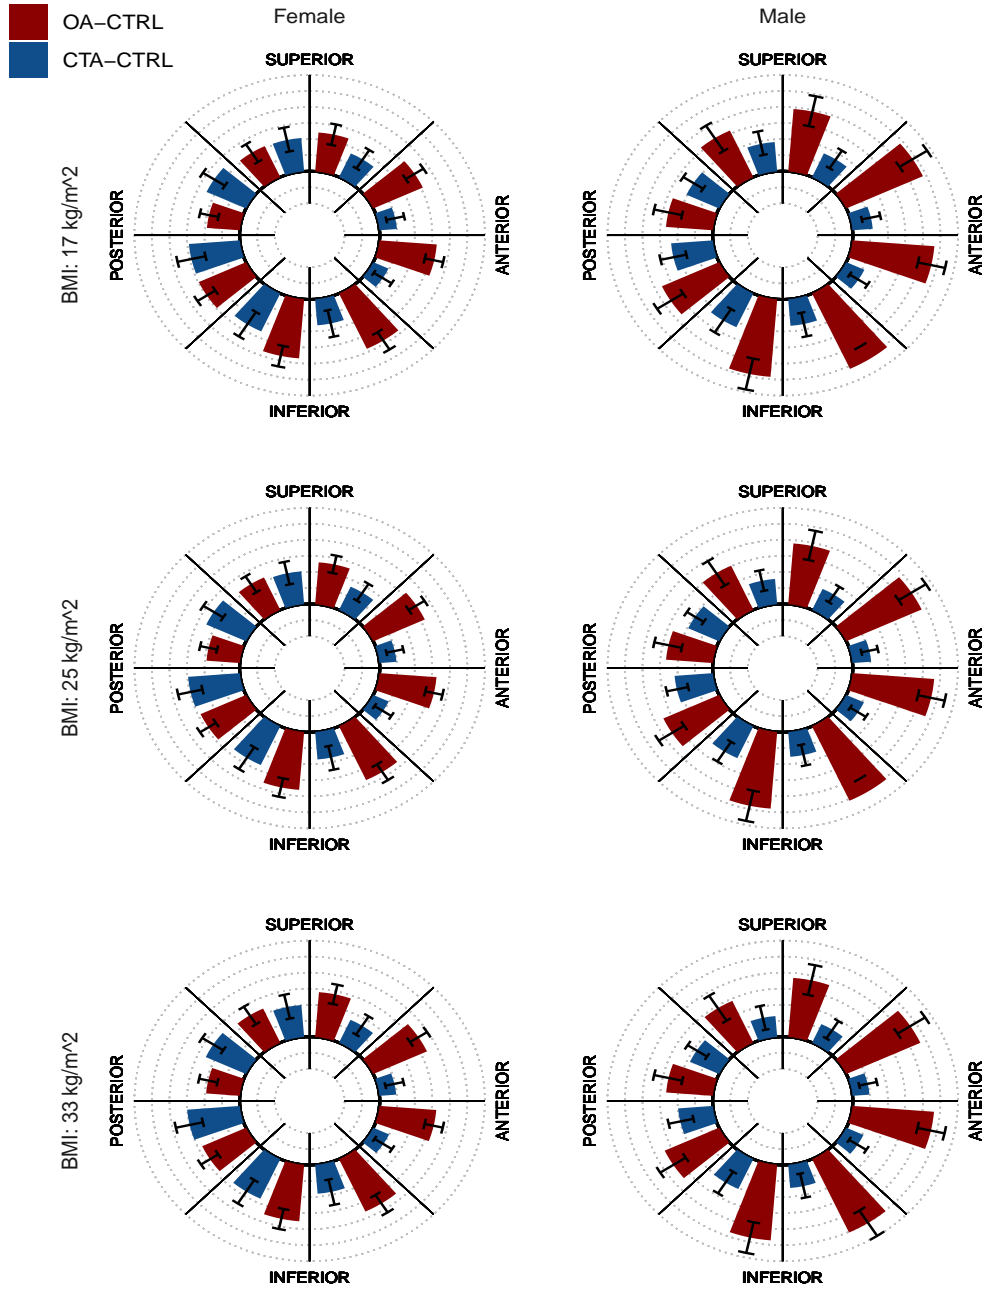

(b)

Figure A13: Difference and 89th percentile interval (errorbar) of BMD in ST between pathological and CTR, for male and female at BMIs 17, 25, and 33 kg/m<sup>2</sup> while keeping age at (a) 50 (b) 60 (c) 70 (d) 80 (e) 90 years. The solid circle corresponds to 0 HU and the interval between the concentric circles corresponds to 100 HU.

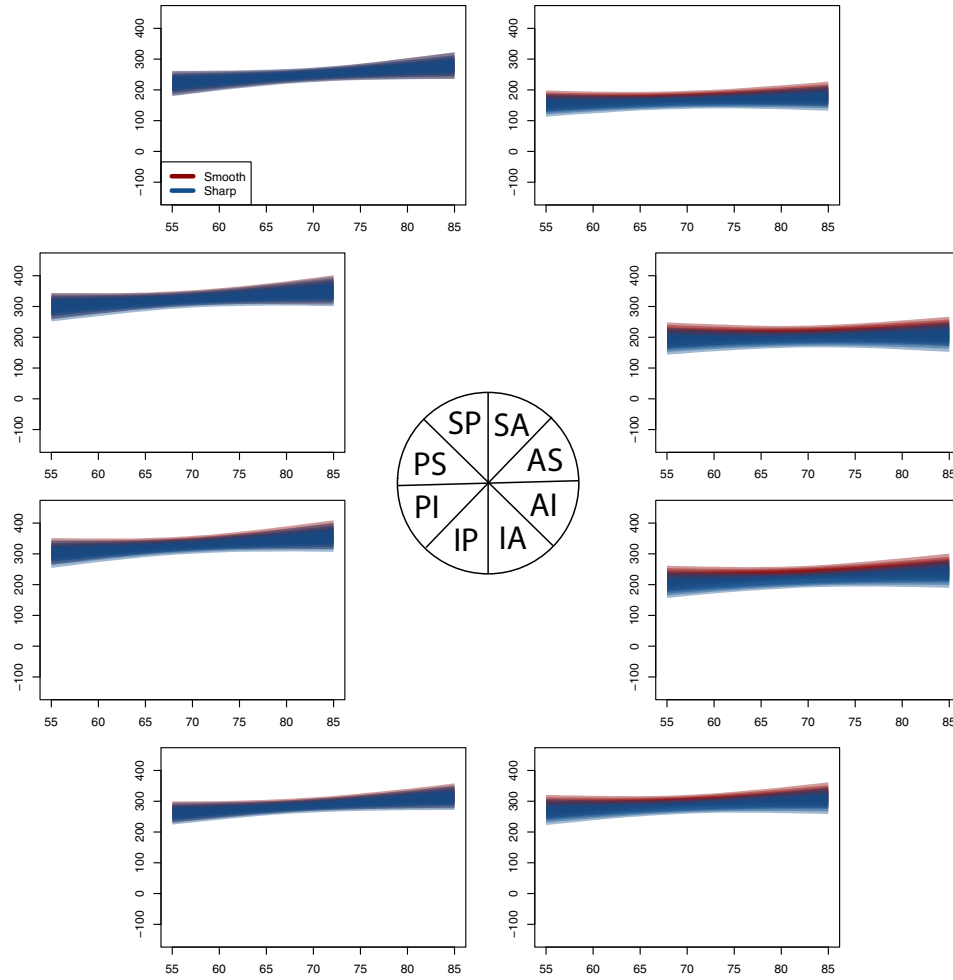

Figure A14: Difference of BMD in ST between female OA and CTRL (vertical axis) vs age (horizontal axis), while keeping BMI at 25 kg/m<sup>2</sup>, for sharp and smooth kernels, and for the 8 locations. The colored surface corresponds to the 89th percentile.

## 10.8 Tables

Table A1: Difference and 89th percentile interval of BMD in ST between OA and CTRL, for male and female at ages 50, 60, 70, 80, and 90 years old, while keeping BMI at 25 kg/m<sup>2</sup>.

| Sex    | Location           | 50 years             | 60 years             | 70 years             | 80 years             | 90 years             |
|--------|--------------------|----------------------|----------------------|----------------------|----------------------|----------------------|
| Female | Superior-Anterior  | 159.4 [117, 204]     | 167.6 [139.9, 194.7] | 174.9 [154.1, 197.2] | 182.7 [150.7, 214.9] | 190.4 [141.1, 240]   |
|        | Anterior-Superior  | 201.3 [150.9, 257.5] | 207.3 [173.8, 242.3] | 212.6 [186, 237.9]   | 217.5 [179.9, 254.8] | 222.4 [162.8, 279.9] |
|        | Anterior-Inferior  | 212.8 [164.2, 265.8] | 225.2 [194.7, 258.6] | 237.4 [215.1, 261.2] | 249.3 [215, 285.6]   | 261.7 [207.6, 317.5] |
|        | Inferior-Anterior  | 274.3 [225.4, 325.1] | 286.9 [257.2, 317.7] | 299.2 [278.9, 320.6] | 311.6 [279.9, 344.8] | 323.9 [272, 377.9]   |
|        | Inferior-Posterior | 255.6 [213.6, 299.8] | 272.9 [246.2, 300.2] | 290.3 [270, 312.6]   | 308.4 [276.8, 340.2] | 326.1 [276.6, 376.2] |
|        | Posterior-Inferior | 298.7 [243.4, 353.2] | 316 [283.7, 350.2]   | 333.9 [311.3, 358.3] | 351.7 [316.7, 389.3] | 369.2 [313, 429.2]   |
|        | Posterior-Superior | 294.6 [239.7, 346.7] | 311.5 [276.4, 343.3] | 328 [303.6, 352.6]   | 344.4 [307.7, 381.7] | 361.8 [304.4, 421.3] |
|        | Superior-Posterior | 214.9 [161.4, 259.7] | 231.9 [200.4, 260.8] | 250 [227.3, 271]     | 268 [235.7, 303.2]   | 285.4 [235.4, 342.5] |
| Male   | Superior-Anterior  | 43.6 [-14.3, 99.3]   | 99.5 [61.2, 135.7]   | 155.9 [119.5, 190.8] | 211.9 [158.5, 266.6] | 267.5 [190.2, 349.7] |
|        | Anterior-Superior  | 66 [1.1, 131.1]      | 125.1 [81.4, 167.2]  | 184.3 [142.5, 223.1] | 243.1 [182, 302.6]   | 303 [212.3, 392.1]   |
|        | Anterior-Inferior  | 26.4 [-47, 92.4]     | 114 [66.2, 157.8]    | 202.7 [160, 245]     | 291.9 [229.2, 354.3] | 379.8 [290.1, 475.8] |
|        | Inferior-Anterior  | 86.9 [9.8, 154.9]    | 182.8 [137, 226]     | 279.9 [241.4, 317.8] | 376.7 [318.1, 439.3] | 473.1 [385.8, 570.4] |
|        | Inferior-Posterior | 121.7 [63.6, 175.8]  | 207 [171, 244.1]     | 293.6 [260.5, 328.8] | 380.4 [329, 433.6]   | 467.1 [390.6, 546.3] |
|        | Posterior-Inferior | 159.7 [86.9, 229.5]  | 246 [199.6, 293.6]   | 334.5 [291.7, 377]   | 423.4 [358.9, 486.5] | 510.7 [418.7, 605.5] |
|        | Posterior-Superior | 177.6 [105.5, 247.6] | 251.3 [205.7, 299.3] | 327.2 [284.7, 372.3] | 403.2 [337.5, 467.8] | 479 [383.1, 576]     |
|        | Superior-Posterior | 133.6 [64, 194.9]    | 186.8 [141.7, 228.5] | 241.1 [202.7, 281.4] | 295.6 [240.1, 356.3] | 349.9 [267.6, 439.6] |

Table A2: Difference and 89th percentile interval of BMD in ST between CTA and CTRL, for male and female at ages 50, 60, 70, 80, and 90 years, while keeping BMI at 25 kg/m<sup>2</sup>.

| Sex    | Location           | 50 years               | 60 years             | 70 years             | 80 years             | 90 years             |
|--------|--------------------|------------------------|----------------------|----------------------|----------------------|----------------------|
| Female | Superior-Anterior  | 64.8 [-4.9, 119.4]     | 110.3 [70.3, 143.3]  | 156.3 [131.6, 179.7] | 203.1 [164.3, 243.7] | 249.6 [186.7, 320.2] |
|        | Anterior-Superior  | -2.8 [-74.7, 56.5]     | 48.2 [5.3, 84.3]     | 100.1 [72, 125.9]    | 152.7 [108.5, 196.3] | 205.3 [135.1, 278.7] |
|        | Anterior-Inferior  | -67.7 [-136.9, -12.6]  | -11.4 [-53.3, 21.6]  | 44.8 [20, 67.6]      | 101.4 [65.6, 139.8]  | 159 [100.2, 224.3]   |
|        | Inferior-Anterior  | -85.4 [-133.9, -42.8]  | -39.7 [-70.3, -14.2] | 5.7 [-14.2, 24.5]    | 51.4 [21.6, 82]      | 97.3 [48.9, 147]     |
|        | Inferior-Posterior | -109.8 [-165.5, -63.6] | -58.7 [-92.5, -30.5] | -7.4 [-30, 15.4]     | 44.9 [9.5, 80.6]     | 97 [40, 154.1]       |
|        | Posterior-Inferior | -73.4 [-152.5, -5.7]   | -12.3 [-58.4, 26.9]  | 48.9 [21.4, 74.1]    | 110.4 [67.1, 155.2]  | 171.7 [98.5, 248.8]  |
|        | Posterior-Superior | 57.3 [-30.9, 130.8]    | 107.9 [57.9, 152.5]  | 160.4 [131.6, 187.7] | 212.9 [166.9, 259.8] | 265.5 [186.9, 348.2] |
|        | Superior-Posterior | 135.5 [58, 197.5]      | 174.8 [129.8, 212.2] | 214.4 [189.6, 238.7] | 255.6 [213.6, 297.3] | 295.8 [226.7, 368.6] |
| Male   | Superior-Anterior  | 42.7 [-1.4, 89.8]      | 81 [49.1, 109.5]     | 118.7 [90.2, 143.9]  | 156 [116, 193.5]     | 193.9 [135.4, 249.6] |
|        | Anterior-Superior  | -40.6 [-89.4, 2.6]     | 8.6 [-24.2, 37.6]    | 57.7 [28.1, 86.6]    | 107.8 [64.1, 152.2]  | 157.7 [93.8, 223.9]  |
|        | Anterior-Inferior  | -80.8 [-124.5, -39.6]  | -25.4 [-53.2, 3.6]   | 31.3 [6.3, 57.1]     | 87.9 [50, 126.6]     | 143.9 [88.5, 202]    |
|        | Inferior-Anterior  | -110.4 [-145.8, -78.5] | -56.8 [-78.7, -35.2] | -2.7 [-22.3, 18.9]   | 52.1 [20.5, 84.9]    | 106.3 [60.4, 155.4]  |
|        | Inferior-Posterior | -127.4 [-166.4, -92.6] | -68.9 [-93.5, -44.3] | -9.6 [-31.8, 15.9]   | 51 [15.2, 87.8]      | 110.7 [57.6, 163.9]  |
|        | Posterior-Inferior | -84.6 [-136.3, -35]    | -24.8 [-59.6, 6.7]   | 34.9 [5.4, 63.8]     | 94.8 [50.4, 139.2]   | 155 [90.2, 221.5]    |
|        | Posterior-Superior | 19.7 [-39.3, 74.6]     | 69.2 [28.6, 104.8]   | 119.5 [83.8, 149.5]  | 168.3 [118.3, 217.3] | 218.2 [146.3, 291.7] |
|        | Superior-Posterior | 104.3 [53.2, 154.8]    | 133.5 [93.5, 166]    | 162.4 [125.1, 190]   | 190.4 [142.2, 231.4] | 218.6 [153, 278.3]   |

Table A3: Difference and 89th percentile interval of BMD in ST between OA and CTRL, for male and female at BMIs 17, 25, and 33 kg/m<sup>2</sup>, while keeping age at 65 years.

| Sex    | Location           | 17 kg/m2             | 22 kg/m2             | 27 kg/m2             | 32 kg/m2             |
|--------|--------------------|----------------------|----------------------|----------------------|----------------------|
| Female | Superior-Anterior  | 169.1 [138, 200.2]   | 170.5 [146.7, 194.2] | 171.7 [149.1, 194.3] | 173.3 [144.9, 201.2] |
|        | Anterior-Superior  | 199.8 [157.8, 238.9] | 206.3 [175.8, 235.6] | 212.8 [185, 240.7]   | 219.1 [184.7, 255.4] |
|        | Anterior-Inferior  | 214 [171.3, 252.9]   | 224.8 [196.3, 253]   | 235.8 [211.8, 262]   | 247.2 [215.8, 282.6] |
|        | Inferior-Anterior  | 280.5 [243, 315.3]   | 288.3 [262.3, 313.8] | 296.2 [273.1, 320.2] | 303.8 [274.1, 335.8] |
|        | Inferior-Posterior | 283 [253.3, 313.8]   | 282.1 [259.5, 306.9] | 281.8 [259.7, 304.3] | 280.9 [253.4, 308.3] |
|        | Posterior-Inferior | 334.6 [298.3, 375.3] | 328.8 [301.4, 358.1] | 322.9 [297.5, 348.8] | 317.1 [283.2, 349.2] |
|        | Posterior-Superior | 327.1 [288.7, 369.6] | 322.8 [293.2, 351.7] | 317.8 [290.2, 343.1] | 312.5 [277.7, 344.7] |
|        | Superior-Posterior | 251.7 [216.6, 287.9] | 245.2 [218.3, 270.2] | 238.2 [213.6, 262.1] | 231.5 [198.9, 262.7] |
| Male   | Superior-Anterior  | 129 [88.5, 167.7]    | 128.5 [92.4, 162.4]  | 127.9 [93.6, 159.5]  | 127.5 [90.9, 161.5]  |
|        | Anterior-Superior  | 170.8 [123.2, 215.9] | 160.9 [120, 200]     | 151.4 [112.6, 188]   | 141.2 [100.1, 180.7] |
|        | Anterior-Inferior  | 168.3 [121.6, 215.7] | 162.5 [120.1, 203.8] | 156.4 [115.4, 195]   | 149.7 [106.9, 189.2] |
|        | Inferior-Anterior  | 239.4 [197, 280.9]   | 234.5 [195.7, 272.2] | 230 [191.7, 266.4]   | 224.5 [184.8, 263.5] |
|        | Inferior-Posterior | 251.6 [215.5, 289.9] | 251.2 [218, 284.9]   | 250.7 [218.6, 282.9] | 249.8 [216.3, 283.2] |
|        | Posterior-Inferior | 297.4 [250.3, 344.6] | 293.2 [250.8, 335.1] | 289.4 [247.8, 330.2] | 284.7 [242.1, 328]   |
|        | Posterior-Superior | 297.6 [251.1, 345.9] | 292.8 [250.9, 336.4] | 288 [248.3, 330.9]   | 283.5 [241.2, 328.8] |
|        | Superior-Posterior | 223.1 [179.5, 267.3] | 217.3 [178.9, 256.5] | 211.8 [174.3, 249.1] | 206.5 [166.6, 245.9] |

Table A4: Difference and 89th percentile interval of BMD in ST between CTA and CTRL, for male and female at BMIs 17, 25, and 33 kg/m<sup>2</sup>, while keeping age at 65 years.

| Sex    | Location           | 17 kg/m <sup>2</sup> | 22 kg/m <sup>2</sup> | 27 kg/m <sup>2</sup> | 32 kg/m <sup>2</sup> |
|--------|--------------------|----------------------|----------------------|----------------------|----------------------|
| Female | Superior-Anterior  | 130.8 [88.9, 165.9]  | 132 [100.5, 159.7]   | 133.8 [104.9, 160.9] | 134.7 [100.3, 172.4] |
|        | Anterior-Superior  | 78.4 [36.1, 118.7]   | 75.6 [42.8, 105.5]   | 72.9 [40.3, 101.1]   | 70.1 [29.5, 106.9]   |
|        | Anterior-Inferior  | 19.3 [-23.2, 54.6]   | 17.8 [-14.3, 44.4]   | 16 [-14.3, 42.3]     | 13.4 [-21.1, 48.5]   |
|        | Inferior-Anterior  | -14.7 [-45.9, 13.5]  | -15.9 [-40.6, 5.8]   | -17.2 [-40.4, 2.8]   | -18.8 [-46.4, 6.9]   |
|        | Inferior-Posterior | -34.4 [-66.9, -3.9]  | -33.5 [-59.9, -8.8]  | -32.5 [-58.3, -8.8]  | -32 [-63.2, -1.1]    |
|        | Posterior-Inferior | 11 [-41.6, 48.8]     | 14.8 [-20.2, 45.6]   | 20.7 [-13, 50.7]     | 25.3 [-15.5, 71.9]   |
|        | Posterior-Superior | 130.4 [75.9, 173.3]  | 132.8 [93.8, 166.1]  | 135.5 [100.2, 169.6] | 137.2 [94.2, 188]    |
|        | Superior-Posterior | 190.4 [136.1, 230.5] | 192.6 [157.1, 223.8] | 195.6 [164.6, 226.2] | 197.4 [159, 246]     |
| Male   | Superior-Anterior  | 109.8 [70.5, 158.9]  | 104.3 [73, 133.6]    | 96.9 [68.7, 121.9]   | 91.3 [46.9, 122.9]   |
|        | Anterior-Superior  | 57.5 [16.5, 112.3]   | 43.1 [12.2, 76.3]    | 26.6 [-2.5, 53.4]    | 11 [-36.2, 45.6]     |
|        | Anterior-Inferior  | 19.8 [-17.8, 64.6]   | 9.8 [-17.2, 39.4]    | -1.1 [-26.3, 23.8]   | -11.1 [-49.5, 21.2]  |
|        | Inferior-Anterior  | -19.9 [-49, 12.5]    | -25.8 [-46.6, -3.2]  | -32.3 [-50.2, -11.5] | -37.9 [-63.7, -11.9] |
|        | Inferior-Posterior | -36.4 [-68.5, -0.2]  | -38.1 [-60.9, -12.3] | -39.9 [-60.4, -16.6] | -41.7 [-69.9, -11.9] |
|        | Posterior-Inferior | 15.4 [-26.2, 62.9]   | 9.4 [-22.2, 41.5]    | 2.5 [-27.3, 31.1]    | -4.1 [-48.3, 34.3]   |
|        | Posterior-Superior | 106.2 [56.4, 161.5]  | 99 [60.4, 135.7]     | 91.1 [54.6, 123.2]   | 83.4 [31.9, 125.4]   |
|        | Superior-Posterior | 165.8 [119.1, 221.3] | 155.5 [116.7, 189.1] | 143.3 [104.8, 171.1] | 131.4 [79.2, 168.2]  |



Table A5: ST BMD and 89th percentile interval for CTRL, male and female at ages 50, 60, 70, 80, and 90 years, while keeping BMI at 25 kg/m<sup>2</sup>.

| Sex    | Location           | 50 years             | 60 years             | 70 years             | 80 years             | 90 years             |
|--------|--------------------|----------------------|----------------------|----------------------|----------------------|----------------------|
| Female | Superior-Anterior  | 268.2 [241.9, 295.3] | 246 [226.7, 265.3]   | 223.4 [203.7, 242.7] | 200.9 [174.3, 227.3] | 178.4 [141.5, 214.4] |
|        | Anterior-Superior  | 293.5 [262.9, 324.6] | 264.2 [241, 287.5]   | 234.4 [210.7, 258.4] | 204.6 [171, 236.5]   | 174.5 [128.5, 218.6] |
|        | Anterior-Inferior  | 307.2 [281.4, 334.5] | 274.3 [255.1, 294.3] | 241.3 [221.3, 260.9] | 208.2 [180.7, 234.2] | 174.9 [137, 210.5]   |
|        | Inferior-Anterior  | 279.5 [256.4, 302.7] | 247.6 [230.8, 264.2] | 215.6 [198.5, 232.3] | 183.5 [158.8, 207.5] | 151.4 [117.2, 184.7] |
|        | Inferior-Posterior | 288 [261, 315.6]     | 253 [232.8, 272.5]   | 217.4 [197.2, 237]   | 181.5 [154.1, 209.4] | 146 [107.9, 184]     |
|        | Posterior-Inferior | 346.9 [319.7, 375.3] | 312.8 [292.8, 332.8] | 278.5 [257.7, 298.4] | 244.1 [215.4, 271.8] | 209.6 [169.3, 249]   |
|        | Posterior-Superior | 353.4 [322.5, 382.9] | 325.2 [303.2, 347.1] | 297.2 [275.7, 319]   | 268.8 [239.3, 299.2] | 241.1 [200.2, 281.9] |
|        | Superior-Posterior | 320.9 [297.6, 344.9] | 301.7 [284.1, 320.1] | 282.4 [264.7, 300.2] | 263.1 [238.5, 287.9] | 243.6 [208.7, 277.9] |
| Male   | Superior-Anterior  | 338.3 [315.4, 360.7] | 299.4 [284.7, 313.6] | 259.9 [242.3, 277]   | 220.5 [191.8, 248]   | 180.8 [139.6, 221.5] |
|        | Anterior-Superior  | 375.8 [347.2, 404.5] | 327.9 [309.3, 345.9] | 279 [257.7, 301.1]   | 230.3 [195.8, 265.6] | 182.1 [130.6, 233.1] |
|        | Anterior-Inferior  | 373.1 [349.9, 397.2] | 316.9 [302, 331.8]   | 260.3 [242, 278.7]   | 203.8 [173.8, 233.3] | 146.8 [103.1, 189.5] |
|        | Inferior-Anterior  | 336.1 [316.2, 356.3] | 282.9 [270.2, 295.7] | 229.4 [213.4, 244.9] | 175.6 [149.5, 201.5] | 122.3 [83.9, 159.8]  |
|        | Inferior-Posterior | 341.7 [317.5, 365.2] | 282.9 [267.6, 297.7] | 223.5 [205.1, 242.1] | 164.6 [134.1, 194.7] | 105 [60.8, 149.2]    |
|        | Posterior-Inferior | 414 [388.4, 439.3]   | 354.4 [338.1, 370]   | 294.5 [275.6, 313.2] | 234.4 [203.6, 265.4] | 174 [129.5, 219.8]   |
|        | Posterior-Superior | 436.7 [410.5, 464]   | 387.6 [370.2, 404.4] | 337.4 [317.3, 357.7] | 286.9 [254.6, 320.1] | 236.9 [190.5, 285.3] |
|        | Superior-Posterior | 391.5 [370, 413.3]   | 361.5 [348.1, 375]   | 331.2 [314.6, 347.9] | 301.2 [273.8, 328.8] | 271 [230.4, 311]     |

Table A6: ST BMD and 89th percentile interval for OA, for male and female at ages 50, 60, 70, 80, and 90 years, while keeping BMI at 25 kg/m<sup>2</sup>.

| Sex    | Location           | 50 years             | 60 years             | 70 years             | 80 years             | 90 years             |
|--------|--------------------|----------------------|----------------------|----------------------|----------------------|----------------------|
| Female | Superior-Anterior  | 428 [387.9, 469.9]   | 413.5 [389.2, 437.2] | 398.7 [384.7, 411.3] | 383.6 [361.6, 405]   | 369.2 [329.5, 405.5] |
|        | Anterior-Superior  | 494.8 [450.4, 546.8] | 471 [444.3, 500.5]   | 446.8 [431.6, 461.1] | 422.2 [396.6, 445.3] | 398.3 [351.3, 438.2] |
|        | Anterior-Inferior  | 520.5 [475, 569.9]   | 499.7 [472.7, 529.1] | 478.6 [463.6, 495.3] | 457.6 [432.3, 482.8] | 436.9 [390.8, 479.6] |
|        | Inferior-Anterior  | 553.9 [507.9, 602.4] | 534.5 [507.1, 563.2] | 514.6 [500.7, 530.4] | 495.5 [470, 520.2]   | 476 [430.7, 519.9]   |
|        | Inferior-Posterior | 542.7 [506.7, 584]   | 525.7 [504.4, 548.9] | 508 [496.6, 520.1]   | 490 [469.8, 510]     | 472.7 [436.2, 507.5] |
|        | Posterior-Inferior | 645.7 [594.8, 697.2] | 629 [599.9, 659.1]   | 612.5 [597.4, 628.7] | 595.8 [570.5, 622.8] | 578.6 [533.9, 627.3] |
|        | Posterior-Superior | 647 [596, 696.6]     | 636.4 [606.1, 665.7] | 625.4 [608, 641.3]   | 614.3 [586.7, 640.7] | 603.3 [555.6, 649.8] |
|        | Superior-Posterior | 535.6 [483.8, 579.4] | 534 [503.4, 560.4]   | 532.9 [515.8, 547.1] | 531.3 [507, 556.5]   | 529.3 [488.6, 576.2] |
| Male   | Superior-Anterior  | 382.4 [328.7, 431.1] | 398.8 [361.6, 433.5] | 415.7 [383, 446.4]   | 432.4 [389.8, 475.1] | 448.7 [390.4, 509.8] |
|        | Anterior-Superior  | 441.7 [384.2, 499.5] | 452.2 [412.5, 493]   | 463.2 [429.9, 495.9] | 473.9 [429.2, 518.2] | 484.9 [420, 549.3]   |
|        | Anterior-Inferior  | 398.5 [333, 458.9]   | 430.7 [384.9, 472.4] | 463.7 [423.2, 499.7] | 495.3 [444.1, 547]   | 526.6 [456.5, 604.4] |
|        | Inferior-Anterior  | 423.7 [350.1, 486.3] | 465.7 [420.7, 506.6] | 509.5 [473.8, 542.8] | 552.9 [503.8, 604.8] | 595.8 [523.9, 678.1] |
|        | Inferior-Posterior | 463.2 [411.9, 510.6] | 489.8 [456.1, 523.2] | 517.7 [489.4, 545.5] | 544.6 [506.9, 584.8] | 572 [517.7, 631.9]   |
|        | Posterior-Inferior | 572.8 [507.2, 637.4] | 600.5 [555.3, 644.9] | 629 [590.2, 667.6]   | 656.9 [606.6, 709]   | 684.7 [613.7, 759.4] |
|        | Posterior-Superior | 614.3 [548, 678.6]   | 638.9 [594.5, 685.9] | 664 [627.1, 705.2]   | 690 [640, 744.9]     | 714.8 [644.1, 792.4] |
|        | Superior-Posterior | 524.7 [461.2, 582.2] | 548.1 [505.6, 589.1] | 572.5 [537.4, 609.6] | 597.1 [551.4, 647.1] | 621.3 [556.8, 694.5] |

Table A7: ST BMD and 89th percentile interval for CTA, for male and female at ages 50, 60, 70, 80, and 90 years, while keeping BMI at 25 kg/m<sup>2</sup>.

| Sex    | Location           | 50 years             | 60 years             | 70 years             | 80 years             | 90 years             |
|--------|--------------------|----------------------|----------------------|----------------------|----------------------|----------------------|
| Female | Superior-Anterior  | 333 [268.3, 383.4]   | 356.4 [318, 385.8]   | 380 [360.4, 396.4]   | 403.7 [376, 435]     | 426.7 [379.4, 485.2] |
|        | Anterior-Superior  | 292.2 [225.3, 341.3] | 313.6 [273.3, 341.8] | 334.7 [314.2, 350.1] | 356.4 [328, 387.2]   | 377.5 [329.8, 436.6] |
|        | Anterior-Inferior  | 240.3 [174.1, 287.6] | 263.4 [223.1, 291]   | 286.8 [266.5, 301]   | 309.5 [284.4, 337.8] | 332.7 [288.3, 385.7] |
|        | Inferior-Anterior  | 194.5 [148.9, 230.9] | 208.2 [180.1, 229.2] | 222 [206.4, 232.3]   | 234.8 [215.7, 255.3] | 248.5 [214.8, 285.2] |
|        | Inferior-Posterior | 177.7 [129.1, 219.5] | 194.1 [163.8, 218.3] | 210.6 [194.6, 222.9] | 226.6 [205, 248.8]   | 242.4 [203.9, 285]   |
|        | Posterior-Inferior | 274 [198.6, 337.1]   | 301 [257.3, 337.3]   | 327.6 [304.6, 345.9] | 353.9 [321.9, 388.9] | 380.5 [323.1, 445.3] |
|        | Posterior-Superior | 410.1 [325.2, 478.1] | 433.9 [385.3, 473.4] | 457.7 [433.7, 479.5] | 481.9 [444.3, 520.6] | 505.7 [440.2, 576.3] |
|        | Superior-Posterior | 456.5 [384.6, 515.8] | 476.3 [434, 512.5]   | 497 [475.8, 516.3]   | 517.9 [485.8, 550.9] | 538.1 [482.5, 602]   |
| Male   | Superior-Anterior  | 381 [339.8, 427.8]   | 380.2 [348.3, 408.8] | 379.2 [352, 398.6]   | 377.3 [345.2, 402.7] | 376.2 [331, 411.7]   |
|        | Anterior-Superior  | 335.7 [292.1, 372.7] | 336.1 [305.9, 363.8] | 337.2 [314.1, 358.5] | 338 [311.6, 366.3]   | 338.7 [303.3, 380.7] |
|        | Anterior-Inferior  | 291.7 [253, 331.4]   | 291.6 [264.6, 319.7] | 291.2 [271.6, 313.4] | 291.3 [267, 317.7]   | 291.2 [254.6, 328.6] |
|        | Inferior-Anterior  | 225.7 [194.3, 254.1] | 225.8 [206, 247.1]   | 226.2 [213, 243.6]   | 227.1 [210.7, 249.1] | 227.5 [203.2, 258.9] |
|        | Inferior-Posterior | 213.3 [180.8, 245.6] | 213.7 [192.2, 237.2] | 213.9 [198.5, 233]   | 214.5 [194.7, 238.7] | 215.1 [186.7, 250.1] |
|        | Posterior-Inferior | 329.3 [280.6, 378.3] | 329.1 [294.8, 362.8] | 329.5 [303.3, 354.1] | 329.4 [297, 361.7]   | 329.6 [283.1, 377.1] |
|        | Posterior-Superior | 456.3 [399.2, 508.9] | 456.7 [415.5, 491.9] | 456.9 [424.5, 483.3] | 456.4 [417.2, 491.2] | 456.8 [401, 508.4]   |
|        | Superior-Posterior | 495 [446.6, 546.7]   | 494.8 [455.3, 528.6] | 494.1 [459.3, 518.4] | 492 [452.9, 522.4]   | 491 [436.7, 531.8]   |
